# Supplementary material for: Vinylogous functionalization of 4-alkylidene-5-aminopyrazoles with methyl trifluoropyruvates
Source: publisher site journal article supplement (doi:10.3762/bjoc.21.41), 2025-03-10
Supplement: Additional file 1 [file 1860-5397-21-41-S1.pdf]

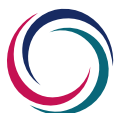

## Supporting Information

for

### Vinylogous functionalization of 4-alkylidene-5-aminopyrazoles with methyl trifluoropyruvates

Judit Hostalet-Romero, Laura Carceller-Ferrer, Gonzalo Blay, Amparo Sanz-Marco, José R. Pedro and Carlos Vila

*Beilstein J. Org. Chem.* **2025**, *21*, 533–540. [doi:10.3762/bjoc.21.41](https://doi.org/10.3762/bjoc.21.41)

**Detailed experimental procedures, characterization data, and copies of  $^1\text{H}$  NMR and  $^{13}\text{C}$  NMR spectra**

## Table of contents

|                                                                                                                               |     |
|-------------------------------------------------------------------------------------------------------------------------------|-----|
| 1. General experimental methods .....                                                                                         | S1  |
| 2. Experimental procedures.....                                                                                               | S2  |
| i) Synthesis of 4-alkenyl-5-aminopyrazoles <b>3</b>                                                                           |     |
| ii) Procedure A for the vinylogous addition of 4-alkenyl-5-aminopyrazoles <b>3</b><br>to alkyl trifluoropyruvates <b>4</b> .  |     |
| iii) Procedure B for the vinylogous addition of 4-alkenyl-5-aminopyrazoles <b>3</b><br>to alkyl trifluoropyruvates <b>4</b> . |     |
| iv) Reaction of acetone with 5-aminopyrazole <b>2a</b>                                                                        |     |
| 3. Characterization of the 4-alkenyl-5-ainopyrazoles <b>3</b> .....                                                           | S4  |
| 4. Characterization of products <b>5</b> .....                                                                                | S8  |
| 5. Characterization of products <b>7</b> .....                                                                                | S13 |
| 6. Asymmetric reactions.....                                                                                                  | S13 |
| 7. NMR data ( <sup>1</sup> H NMR and <sup>13</sup> C NMR experiments) .....                                                   | S14 |
| 8. HPLC data .....                                                                                                            | S36 |
| 9. References.....                                                                                                            | S37 |

## **1. General experimental methods**

Unless otherwise noticed, commercial reagents were used without any extra purification. Reactions were followed by thin layer chromatography (TLC) using Merck Silica Gel 60 F-254 thin layer plates. For product purification, flash column chromatography using Merck silica gel 60, 0.040–0.063 mm was used. The diastereomeric ratio (dr) was determined via  $^1\text{H}$ -NMR analysis. NMR spectra were carried out in a Bruker Avance III HD spectrometer at 300 MHz for  $^1\text{H}$  and at 75 MHz for  $^{13}\text{C}$ , in a Bruker AV400 spectrometer at 400 MHz for  $^1\text{H}$  and at 100 MHz for  $^{13}\text{C}$  or in a Bruker Neo500 spectrometer at 500 MHz for  $^1\text{H}$  and at 126 MHz for  $^{13}\text{C}$  using residual non-deuterated solvent as internal standard ( $\text{CHCl}_3$ :  $\delta$  7.26 for  $^1\text{H}$  and 77.0 ppm for  $^{13}\text{C}$ ). Chemical shifts are given in ppm. The carbon type was determined by Distortionless Enhancement by Polarization Transfer (DEPT) experiments. High resolution mass spectra (ESI) were recorded on a TRIPLETOFT5600 spectrometer equipped with an electrospray source with a capillary voltage of 4.5 kV. Cyclic ketones **1**, 5-aminopyrazoles **2** and alkyl trifluoropyruvates **4** are commercial reactants and were used without subsequent purification. These reactions have been acquired from the following commercial cases: Aldrich, TCI, BLD and Fluorochem.

## 2. Experimental procedures

### i. Synthesis of 4-alkenyl-5-aminopyrazoles **3**

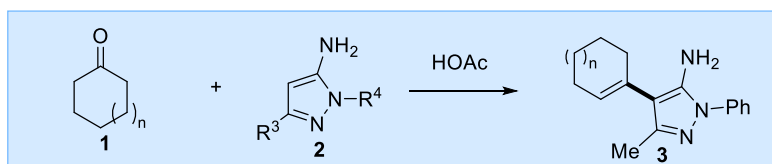

In a 25 mL round-bottomed flask, the 5-aminopyrazole (1 equiv) was dissolved in the cyclic ketone (1.5 equiv) and 0.5 mL glacial acetic acid (if the cyclic ketone was solid 2 mL of CH<sub>2</sub>Cl<sub>2</sub> were used as solvent). Next, the reaction mixture was left, with stirring, at room temperature for a period of 3–5 days following the reaction using thin layer chromatography (TLC). The reaction mixture was evaporated under reduced pressure and the crude was purified via column chromatography with hexane:EtOAc mixtures as eluent to afford the corresponding products **3**.

### ii. Procedure A for the vinylogous addition of 4-alkenyl-5-aminopyrazoles **3** to alkyl trifluoropyruvates **4**.

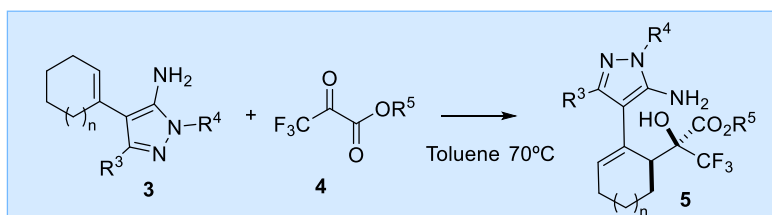

In a 10 mL round-bottomed flask, the corresponding 4-alkenyl-5-aminopyrazole (**3**, 0.2 mmol, 1 equiv) and the alkyl trifluoropyruvate (**4**, 0.6 mmol, 3 equiv) were dissolved in 2 mL toluene. The reaction mixture was heated at 70 °C with a condenser for 1 day. After this time, the solvent was evaporated under reduced pressure and the diastereoisomeric ratio was evaluated using <sup>1</sup>H NMR of the crude reaction mixture. Subsequently, the crude was purified via column chromatography with hexane:EtOAc mixtures or hexane:DCM mixtures as eluent to afford the corresponding alcohols **5**.

### iii. Procedure B for the vinylogous addition of 4-alkenyl-5-aminopyrazoles **3** to alkyl trifluoropyruvates **4**.

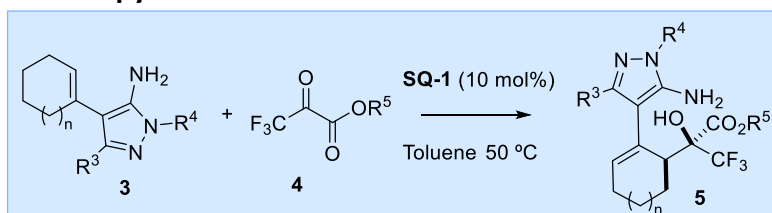

In a 10 mL round-bottomed flask, the corresponding 4-alkenyl-5-aminopyrazole (**3**, 0.2 mmol, 1 equiv), **SQ-1** (0.02 mmol, 10 mol %) and the alkyl trifluoropyruvate (**4**,

0.6 mmol, 3 equiv) were dissolved in 2 mL toluene. The reaction mixture was heated at 50 °C with a condenser for 1 day. After this time, the solvent was evaporated under reduced pressure and the diastereoisomeric ratio was evaluated using  $^1\text{H}$  NMR of the crude reaction mixture. Subsequently, the crude was purified via column chromatography with hexane:EtOAc mixtures or hexane:DCM mixtures as eluent to afford the corresponding alcohols **5**.

**iv. Reaction of acetone with 5-aminopyrazole **2a**.**

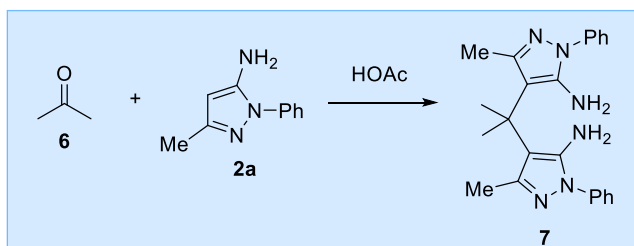

In a 25 mL round-bottomed flask, the 5-aminopyrazole **2a** (0.87 g, 5 mmol) was dissolved in acetone (0.73 mL, 10 mmol) and 0.5 mL glacial acetic acid. Next, the reaction mixture is left, with stirring, at room temperature for a period of 3–5 days following the reaction using thin layer chromatography (TLC). The reaction mixture was evaporated under reduced pressure and the crude was purified via column chromatography with hexane:EtOAc mixtures as eluent to afford the corresponding products **7**.

### 3. Characterization of 4-alkenyl-5-aminopyrazoles 3

#### Compound **3aa**<sup>1</sup>:

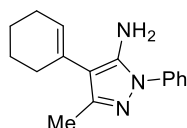

Following general procedure i), product **3aa** was synthesized using 1.2 mL (12 mmol) of cyclohexanone (**1a**) with 1.39 g (8 mmol) 5-aminopyrazole (**2a**) obtaining 0.98 g (63% yield) of the product **3aa** as a yellow solid (m.p. = 86-90 °C).

<sup>1</sup>H RMN (300 MHz, CDCl<sub>3</sub>) δ 7.57 (dd, *J* = 8.6, 1.2 Hz, 2H), 7.49-7.41 (m, 2H), 7.34-7.27 (m, 1H), 5.67 (tt, *J* = 3.6, 1.7 Hz, 1H), 3.77 (s, 2H), 2.30-2.13 (m, 7H), 1.82-1.60 (m, 4H).  
<sup>13</sup>C RMN (75 MHz, CDCl<sub>3</sub>) δ 147.2 (C), 141.6 (C), 138.9 (C), 130.5 (C), 129.4 (CH), 126.8 (CH), 126.2 (CH), 123.5 (CH), 107.1 (C), 29.2 (CH<sub>2</sub>), 25.6 (CH<sub>2</sub>), 23.1 (CH<sub>2</sub>), 22.2 (CH<sub>2</sub>), 13.6 (CH<sub>3</sub>).

#### • Compound **3ba**:

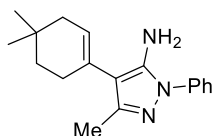

Following general procedure i), product **3ba** was synthesized using 1.51 g (12 mmol) of 4,4-dimethylcyclohexan-1-one (**1b**) with 1.39 g (8 mmol) 5-aminopyrazole (**2a**) obtaining 1.06 g (47% yield) of the product **3ba** as a yellow solid (m.p. = 123-126 °C).

<sup>1</sup>H NMR (300 MHz, CDCl<sub>3</sub>) δ 7.57 (dd, *J* = 8.6, 1.2 Hz, 2H), 7.53-7.40 (m, 2H), 7.35-7.27 (m, 1H), 5.59 (tt, *J* = 3.8, 1.8 Hz, 1H), 3.75 (s, 2H), 2.27 (ddt, *J* = 6.5, 4.3, 2.1 Hz, 2H), 2.23 (s, 3H), 1.98 (dd, *J* = 4.1, 2.3 Hz, 2H), 1.50 (t, *J* = 6.4 Hz, 2H), 0.99 (s, 6H). <sup>13</sup>C NMR (75 MHz, CDCl<sub>3</sub>) δ 147.2 (C), 141.6 (C), 138.9 (C), 129.4 (CH), 129.2 (C), 126.8 (CH), 125.2 (CH), 123.5 (CH), 106.8 (C), 39.6 (CH<sub>2</sub>), 35.8 (CH<sub>2</sub>), 28.3 (CH<sub>3</sub>), 28.2 (C), 27.0 (CH<sub>2</sub>), 13.6 (CH<sub>3</sub>)

#### • Compound **3ca**:

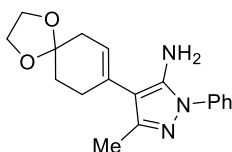

Following general procedure i), product **3ca** was synthesized using 0.94 g (6 mmol) of 1,4-dioxaspiro[4.5]decan-8-one (**1c**) with 0.69 g (4 mmol) 5-aminopyrazole (**2a**) obtaining 0.86 g (69% yield) of the product **3ca** as a yellow solid (m.p. = 102-105 °C).

<sup>1</sup>H NMR (300 MHz, CDCl<sub>3</sub>) δ 7.56 (dd, *J* = 8.6, 1.2 Hz, 1H), 7.51-7.39 (m, 1H), 7.34-7.27 (m, 1H), 5.56 (tt, *J* = 3.6, 1.5 Hz, 1H), 4.02 (s, 3H), 3.80 (s, 1H), 2.50 (tt, *J* = 6.0, 1.7 Hz, 1H), 2.47-2.43 (m, 1H), 2.24 (s, 2H), 1.89 (t, *J* = 6.4 Hz, 1H). <sup>13</sup>C NMR (100 MHz, CDCl<sub>3</sub>) δ 147.1 (C), 141.7 (C), 138.8 (C), 130.2 (C), 129.4 (CH), 126.9 (CH), 123.6 (CH), 122.8 (CH), 107.6 (C), 105.9 (C), 64.4 (CH<sub>2</sub>), 36.1 (CH<sub>2</sub>), 31.4 (CH<sub>2</sub>), 28.4 (CH<sub>2</sub>), 13.7 (CH<sub>3</sub>).

• Compound 3da:

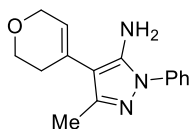

Following general procedure i), product **3da** was synthesized using 0.56 mL (6 mmol) of tetrahydro-4*H*-pyran-4-one (**1d**) with 0.69 g (4 mmol) 5-aminopyrazole (**2a**) obtaining 0.12 g (11% yield) of the product **3da** as a yellow solid (m.p. = 98-102 °C).

<sup>1</sup>H NMR (300 MHz, CDCl<sub>3</sub>) δ 7.57-7.48 (m, 2H), 7.42 (t, *J* = 7.8 Hz, 2H), 7.33-7.25 (m, 1H), 5.65 (tt, *J* = 2.9, 1.6 Hz, 1H), 4.27 (q, *J* = 2.7 Hz, 2H), 3.88 (t, *J* = 5.4 Hz, 2H), 3.84 (s, 2H), 2.38 (tt, *J* = 5.4, 2.6, 1.7 Hz, 2H), 2.22 (s, 3H). <sup>13</sup>C NMR (126 MHz, CDCl<sub>3</sub>) δ 146.8 (C), 141.8 (C), 138.5 (C), 129.3 (CH), 128.4 (C), 126.9 (CH), 123.5 (CH), 123.5 (CH), 104.8 (C), 65.5 (CH<sub>2</sub>), 64.3 (CH<sub>2</sub>), 29.0 (CH<sub>2</sub>), 13.6 (CH<sub>3</sub>).

• Compound 3ec:

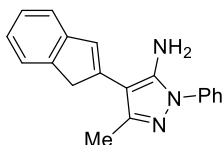

Following general procedure i), product **3da** was synthesized using 0.79 g (6 mmol) of 1,3-dihydro-2*H*-inden-2-one (**1e**) with 0.69 g (4 mmol) 5-aminopyrazole (**2a**) obtaining 0.54 g (47% yield) of the product **3da** as a brown oil.

<sup>1</sup>H NMR (300 MHz, CDCl<sub>3</sub>) δ 7.58 (dd, *J* = 8.7, 1.2 Hz, 2H), 7.54-7.46 (m, 2H), 7.47 (dd, *J* = 7.3, 0.9 Hz, 1H), 7.41-7.34 (m, 2H), 7.28 (dd, *J* = 7.5, 1.2 Hz, 1H), 7.15 (td, *J* = 7.3, 1.1 Hz, 1H), 6.79-6.77 (m, 1H), 4.12 (s, 2H), 3.79 (s, 2H), 2.45 (s, 3H). <sup>13</sup>C NMR (126 MHz, CDCl<sub>3</sub>) δ 147.5 (C), 145.5 (C), 142.8 (C), 141.9 (C), 139.9 (C), 138.2 (C), 129.6 (CH), 127.5 (CH), 126.6 (CH), 124.0 (CH), 123.8 (CH), 123.7 (CH), 123.3 (CH), 120.0 (CH), 101.2 (C), 41.1 (CH<sub>2</sub>), 14.9 (CH<sub>3</sub>)

• Compound 3fa:

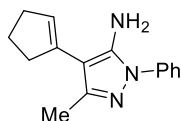

Following general procedure i), product **3da** was synthesized using 1.1 mL (12 mmol) of cyclopentanone (**1f**) with 1.39 g (8 mmol) 5-aminopyrazole (**2a**) obtaining 0.10 g (5% yield) of the product **3fa** as a yellow oil.

<sup>1</sup>H NMR (300 MHz, CDCl<sub>3</sub>) δ 7.35 (dd, *J* = 7.4, 1.2 Hz, 2H), 7.32 – 7.20 (m, 2H), 7.18 – 7.06 (m, 1H), 5.45 (p, *J* = 2.3 Hz, 1H), 3.75 (s, 2H), 2.58 – 2.45 (m, 2H), 2.38 – 2.24 (m, 2H), 2.11 (s, 3H), 1.86 – 1.70 (m, 2H). <sup>13</sup>C NMR (101 MHz, CDCl<sub>3</sub>) δ 147.4 (C), 142.3 (C), 138.5 (C), 135.6 (C), 129.4 (CH), 127.0 (CH), 123.7 (CH), 123.7 (CH), 101.4 (C), 35.3 (CH<sub>2</sub>), 32.6 (CH<sub>2</sub>), 23.4 (CH<sub>2</sub>), 14.4 (CH<sub>3</sub>).

• Compound 3ga:

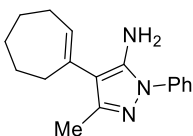

Following general procedure i), product **3ga** was synthesized using 1.4 mL (12 mmol) of cycloheptanone (**1g**) with 1.39 g (8 mmol) 5-aminopyrazole (**2a**) obtaining 0.12 g (6% yield) of the product **3ga** as a yellow oil.

**<sup>1</sup>H NMR (400 MHz, CDCl<sub>3</sub>)** δ 7.56 (d, *J* = 7.5 Hz, 2H), 7.44 (t, *J* = 7.8 Hz, 2H), 7.31 (dd, *J* = 7.4, 1.1 Hz, 1H), 5.84 (t, *J* = 6.6 Hz, 1H), 3.79 (s, 2H), 2.61 – 2.37 (m, 2H), 2.32 – 2.25 (m, 2H), 2.23 (d, *J* = 1.0 Hz, 3H), 1.84 (dtd, *J* = 11.8, 5.6, 3.2 Hz, 2H), 1.73 – 1.50 (m, 4H). **<sup>13</sup>C NMR (101 MHz, CDCl<sub>3</sub>)** δ 146.9 (C), 141.3 (C), 138.7 (C), 137.2 (C), 131.5 (CH), 129.4 (CH), 126.9 (CH), 123.5 (CH), 108.9 (C), 33.9 (CH<sub>2</sub>), 32.8 (CH<sub>2</sub>), 28.8 (CH<sub>2</sub>), 27.3 (CH<sub>2</sub>), 27.2 (CH<sub>2</sub>), 13.3 (CH<sub>3</sub>).

• Compound 3ab<sup>2</sup>:

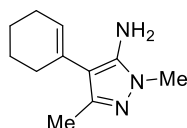

Following general procedure i), product **3aa** was synthesized using 0.6 mL (6 mmol) of cyclohexanone (**1a**) with 0.44 g (8 mmol) 5-aminopyrazole (**2b**) obtaining 0.41 g (54% yield) of the product **3ab** as a white solid (m.p. = 178-180 °C).

**<sup>1</sup>H NMR (400 MHz, CDCl<sub>3</sub>)** 5.54 (tt, *J* = 3.5, 1.6 Hz, 1H), 3.60 (s, 3H), 3.45 (s, 1H), 2.22 – 2.15 (m, 4H), 2.14 (s, 3H), 1.75-1.61 (m, 4H). **<sup>13</sup>C NMR (75 MHz, CDCl<sub>3</sub>)** δ 144.7 (C), 141.5 (C), 130.9 (C), 125.5 (CH), 107.4 (C), 34.1 (CH<sub>3</sub>), 29.3 (CH<sub>2</sub>), 25.5 (CH<sub>2</sub>), 23.1 (CH<sub>2</sub>), 22.2 (CH<sub>2</sub>), 13.5 (CH<sub>3</sub>).

• Compound 3ac<sup>2</sup>:

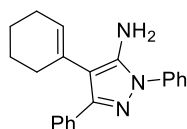

Following general procedure i), product **3ac** was synthesized using 0.3 mL (3 mmol) of cyclohexanone (**1a**) with 0.47 g (2 mmol) 5-aminopyrazole (**2c**) obtaining 0.10 g (16% yield) of the product **3ac** as an orange solid (m.p. = 96-106 °C).

**<sup>1</sup>H NMR (400 MHz, CDCl<sub>3</sub>)** δ 7.81 – 7.74 (m, 2H), 7.69 (dd, *J* = 8.6, 1.2 Hz, 2H), 7.53 – 7.44 (m, 2H), 7.41 – 7.34 (m, 2H), 7.34 – 7.27 (m, 2H), 5.84 (tt, *J* = 3.7, 1.7 Hz, 1H), 3.84 (s, 2H), 2.25 (d, *J* = 2.3 Hz, 2H), 2.03 (d, *J* = 1.9 Hz, 2H), 1.68 (t, *J* = 3.2 Hz, 4H). **<sup>13</sup>C NMR (75 MHz, CDCl<sub>3</sub>)** δ 149.0 (C), 142.3 (C), 134.0 (C), 134.3 (C), 131.4 (C), 129.4 (CH), 128.1 (CH), 127.49 (CH), 127.46 (CH), 127.2 (CH), 127.0 (CH), 123.6 (CH), 106.4 (C), 29.4 (CH<sub>2</sub>), 25.8 (CH<sub>2</sub>), 23.1 (CH<sub>2</sub>), 22.2 (CH<sub>2</sub>).



• Compound 3ad:

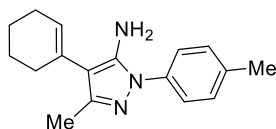

Following general procedure i), product **3ac** was synthesized using 0.3 mL (3 mmol) of cyclohexanone (**1a**) with 0.37 g (2 mmol) 5-aminopyrazole (**2d**) obtaining 0.25 g (46% yield) of the product **3ac** as a yellow solid (m.p. = 91-92 °C).

**<sup>1</sup>H NMR (300 MHz, CDCl<sub>3</sub>)** δ 7.43 (d, *J* = 8.4 Hz, 2H), 7.31 – 7.11 (m, 2H), 5.66 (tt, *J* = 3.6, 1.7 Hz, 1H), 3.73 (s, 2H), 2.38 (s, 3H), 2.29 – 2.11 (m, 7H), 1.88 – 1.59 (m, 4H). **<sup>13</sup>C NMR (126 MHz, CDCl<sub>3</sub>)** δ 146.8 (C), 141.6 (C), 136.7 (C), 136.4 (C), 130.6 (C), 129.9 (CH), 126.0 (CH), 123.6 (CH), 106.9 (C), 29.3 (CH<sub>2</sub>), 25.6 (CH<sub>2</sub>), 23.1 (CH<sub>2</sub>), 22.3 (CH<sub>2</sub>), 21.1 (CH<sub>3</sub>), 13.6 (CH<sub>3</sub>).

#### 4. Characterization of products 5

##### • Compound 5aaa:

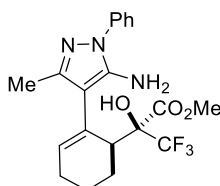

Following general procedure A, product **5aaa** was synthesized as colorless oil in 64% yield (0.128 mmol, 52.4 mg). Diastereoisomeric ratio (7:1) was determined via <sup>1</sup>H NMR analysis. The enantiomeric excess was determined by HPLC using a chiral stationary phase (Chiralpak® AYH), using hexane:iPrOH 80:20, 1.0mL/min, first enantiomer t<sub>R</sub> = 4.77 min, second enantiomer t<sub>R</sub> = 6.17 min.

**<sup>1</sup>H NMR (300 MHz, CDCl<sub>3</sub>)** δ 7.58-7.51 (m, 2H), 7.46 (t, *J* = 7.7 Hz, 2H), 7.37-7.29 (m, 1H), 5.89 (td, *J* = 3.9, 1.4 Hz, H), 4.06 (s, 1H), 3.74 (s, 2H), 3.54 (s, 3H), 3.38-3.30 (m, 1H), 2.19 (ddd, *J* = 7.7, 3.7, 1.9 Hz, 2H), 2.13 (s, 3H), 2.10-1.88 (m, 3H), 1.74-1.52 (m, 1H). **<sup>13</sup>C NMR (75 MHz, CDCl<sub>3</sub>)** δ 170.6 (C), 147.5 (C), 143.1 (C), 138.7 (C), 135.5 (CH), 129.5 (CH), 127.2 (CH), 126.4 (C), 123.8 (CH), 123.72 (q, *J* = 288.8 Hz, CF<sub>3</sub>), 104.5 (C), 79.5 (q, *J* = 27.4 Hz, C), 53.8 (CH<sub>3</sub>), 40.7 (CH), 25.5 (CH<sub>2</sub>), 24.7 (q, *J* = 2.5 Hz, CH<sub>2</sub>), 19.31 (CH<sub>2</sub>), 12.64 (CH<sub>3</sub>). **<sup>19</sup>F NMR (282 MHz, CDCl<sub>3</sub>)** δ -73.51. **HRMS (ESI)** m/z 410.1689 [M+H]<sup>+</sup> C<sub>20</sub>H<sub>23</sub>F<sub>3</sub>N<sub>3</sub>O<sub>3</sub><sup>+</sup> requires 410.1686.

##### • Compound 5aab:

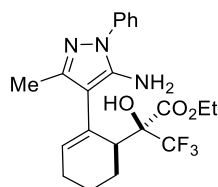

Following general procedure A, product **5aab** was synthesized as colorless oil in 56% yield (0.112 mmol, 50.9 mg). Diastereoisomeric ratio (6:1) was determined via <sup>1</sup>H NMR analysis.

**<sup>1</sup>H NMR (500 MHz, CDCl<sub>3</sub>)** δ 7.52 (dd, *J* = 8.6, 1.2 Hz, 2H), 7.49-7.41 (m, 2H), 7.32 (tt, *J* = 7.0, 1.3 Hz, 1H), 5.88 (td, *J* = 3.9, 1.3 Hz, 1H), 4.10-4.01 (m, 2H), 3.76-3.63 (m, 3H), 3.33 (s, 1H), 2.27-2.16 (m, 2H), 2.13 (s, 3H), 2.12-2.06 (m, 1H), 2.03-1.96 (m, 1H), 1.95-1.82 (m, 1H), 1.63 (dtd, *J* = 13.0, 6.8, 2.8 Hz, 1H), 1.21 (t, *J* = 7.2 Hz, 3H). **<sup>13</sup>C NMR (75 MHz, CDCl<sub>3</sub>)** δ 170.1 (C), 147.5 (C), 143.2 (C), 138.6 (C), 135.4 (CH), 129.5 (CH), 127.2 (CH), 126.4 (C), 123.77 (CH), 123.77 (q, *J* = 288.9 Hz, CF<sub>3</sub>), 104.6 (C), 79.6 (q, *J* = 27.4 Hz), 63.6 (CH<sub>2</sub>), 40.5 (CH), 25.5 (CH<sub>2</sub>), 24.7 (q, *J* = 2.4 Hz, CH<sub>2</sub>), 19.1 (CH<sub>2</sub>), 13.5 (CH<sub>3</sub>), 12.7 (CH<sub>3</sub>). **<sup>19</sup>F NMR (282 MHz, CDCl<sub>3</sub>)** δ -73.04. **HRMS (ESI)** m/z 424.1847 [M+H]<sup>+</sup> C<sub>21</sub>H<sub>25</sub>F<sub>3</sub>N<sub>3</sub>O<sub>3</sub><sup>+</sup> requires 424.1843.

.

Compound 5baa:

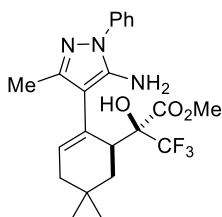

Following general procedure A, product **5baa** was synthesized as colorless oil in 54% yield (0.108 mmol, 47.5 mg). Diastereoisomeric ratio (6:1) was determined via  $^1\text{H}$  NMR analysis.

$^1\text{H}$  NMR (300 MHz,  $\text{CDCl}_3$ )  $\delta$  7.54 (dd,  $J = 8.4, 1.3$  Hz, 2H), 7.49-7.42 (m, 2H), 7.38-7.29 (m, 1H), 5.78 (dt,  $J = 6.1, 2.1$  Hz, 1H), 4.31 (s, 1H), 3.75 (s, 2H), 3.60 (s, 3H), 3.34 (dtt,  $J = 9.7, 3.8, 2.0$  Hz, 1H), 2.08 (s, 3H), 2.03 (dd,  $J = 4.1, 2.1$  Hz, 1H), 1.91-1.58 (m, 3H), 1.06 (s, 3H), 1.05 (s, 3H).  $^{13}\text{C}$  NMR (75 MHz,  $\text{CDCl}_3$ )  $\delta$  170.1 (C), 147.9 (C), 143.1 (C), 138.5 (C), 135.2 (CH), 129.5 (CH), 127.6 (q,  $J = 273.5$  Hz,  $\text{CF}_3$ ), 127.4 (CH), 124.1 (CH), 104.0 (C), 79.8 (q,  $J = 26.9$  Hz, C), 53.8 ( $\text{CH}_3$ ), 40.8 (CH), 39.0 ( $\text{CH}_2$ ), 36.7 ( $\text{CH}_2$ ), 31.8 ( $\text{CH}_3$ ), 29.2 (C), 24.3 ( $\text{CH}_3$ ), 12.3 ( $\text{CH}_3$ ).  $^{19}\text{F}$  NMR (282 MHz,  $\text{CDCl}_3$ )  $\delta$  -72.76. HRMS (ESI)  $m/z$  438.2005  $[\text{M}+\text{H}]^+$   $\text{C}_{22}\text{H}_{27}\text{F}_3\text{N}_3\text{O}_3^+$  requires 438.1999.

Compound 5caa:

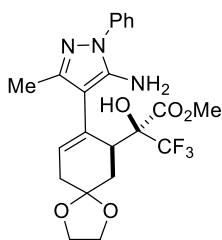

Following general procedure A, product **5caa** was synthesized as colorless oil in 29% yield (0.058 mmol, 27.2 mg). Diastereoisomeric ratio (7:1) was determined via  $^1\text{H}$  NMR analysis.

$^1\text{H}$  NMR (500 MHz,  $\text{CDCl}_3$ )  $\delta$  7.54 (dd,  $J = 8.6, 1.2$  Hz, 1H), 7.48-7.42 (m, 1H), 7.35-7.29 (m, 1H), 5.81 (td,  $J = 3.9, 1.6$  Hz, 1H), 5.77 (s, 1H), 4.1-3.96 (m, 4H), 3.83 (s, 2H), 3.77-3.70 (m, 1H), 3.48 (s, 3H), 2.52-2.48 (m, 1H), 2.31-2.25 (m, 1H), 2.19-2.14 (m, 1H), 2.13 (s, 2H).  $^{13}\text{C}$  NMR (126 MHz,  $\text{CDCl}_3$ )  $\delta$  168.1 (C), 147.8 (C), 144.0 (C), 138.6 (C), 135.8 (C), 131.8 (CH), 129.5 (CH), 127.2 (CH), 126.6 (C), 123.8 (CH), 106.7 (C), 79.8 (q,  $J = 27.0$  Hz, C), 64.9 ( $\text{CH}_2$ ), 64.7 ( $\text{CH}_2$ ), 53.1 ( $\text{CH}_3$ ), 36.5 ( $\text{CH}_2$ ), 32.7 ( $\text{CH}_2$ ), 30.3 (CH), 12.5 ( $\text{CH}_3$ ).  $^{19}\text{F}$  NMR (282 MHz,  $\text{CDCl}_3$ )  $\delta$  -72.77. HRMS (ESI)  $m/z$  468.1738  $[\text{M}+\text{H}]^+$   $\text{C}_{22}\text{H}_{25}\text{F}_3\text{N}_3\text{O}_5^+$  requires 468.1741.

**Compound 5daa:**

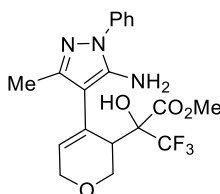

Following general procedure A, product **5daa** was synthesized as yellow oil in 66% yield (0.132 mmol, 54.2 mg). Diastereoisomeric ratio (1.13:1) was determined via  $^1\text{H}$  NMR analysis.

Diastereoisomer 1:  $^1\text{H}$  NMR (400 MHz,  $\text{CDCl}_3$ )  $\delta$  7.52 (dd,  $J = 8.6, 1.3$  Hz, 2H), 7.50-7.43 (m, 2H), 7.37-7.30 (m, 1H), 5.96 (dt,  $J = 2.9, 1.5$  Hz, 1H), 4.70 (s, 1H), 4.45 (d,  $J = 12.5$  Hz, 1H), 4.42-4.30 (m, 2H), 3.94-3.88 (m, 1H), 3.83 (d,  $J = 2.5$  Hz, 2H), 3.43 (s, 3H), 3.28 (s, 1H), 2.18 (s, 3H).  $^{13}\text{C}$  NMR (75 MHz,  $\text{CDCl}_3$ )  $\delta$  167.8 (C), 147.2 (C), 143.7 (C), 138.4 (C), 130.9 (CH), 129.60 (CH), 127.3 (CH), 125.7 (C), 123.8 (q,  $J = 284.8$  Hz,  $\text{CF}_3$ ), 123.6 (CH), 102.4 (C), 79.80 (q,  $J = 28.0$  Hz, C), 66.6 ( $\text{CH}_2$ ), 66.0 ( $\text{CH}_2$ ), 53.0 ( $\text{CH}_3$ ), 39.5 (CH), 13.0 ( $\text{CH}_3$ ).  $^{19}\text{F}$  NMR (282 MHz,  $\text{CDCl}_3$ )  $\delta$  -73.62. HRMS (ESI)  $m/z$  412.1482  $[\text{M}+\text{H}]^+$   $\text{C}_{19}\text{H}_{21}\text{F}_3\text{N}_3\text{O}_4^+$  requires 412.1479.

Diastereoisomer 2:  $^1\text{H}$  NMR (400 MHz,  $\text{CDCl}_3$ )  $\delta$  7.54 (d,  $J = 7.5$  Hz, 2H), 7.46 (t,  $J = 7.6$  Hz, 2H), 7.32 (t,  $J = 7.4$  Hz, 1H), 5.92 (t,  $J = 2.3$  Hz, 1H), 4.34 (d,  $J = 2.9$  Hz, 1H), 4.32 (t,  $J = 2.3$  Hz, 1H), 4.29-4.24 (m, 1H), 4.17 (d,  $J = 12.2$  Hz, 1H), 3.92 (s, 2H), 3.85 (d,  $J = 1.1$  Hz, 3H), 3.79 (dd,  $J = 12.2, 2.7$  Hz, 1H), 3.16 (s, 1H), 2.21 (s, 3H).  $^{13}\text{C}$  NMR (75 MHz,  $\text{CDCl}_3$ )  $\delta$  169.8 (C), 146.6 (C), 142.6 (C), 138.5 (C), 129.9 (CH), 129.5 (CH), 127.2 (CH), 125.8 (C), 123.7 (CH), 104.4 (C), 80.2 (q,  $J = 28.8$  Hz, C), 66.3 ( $\text{CH}_2$ ), 65.8 ( $\text{CH}_2$ ), 53.8 ( $\text{CH}_3$ ), 40.2 (CH), 13.3 ( $\text{CH}_3$ ).  $^{19}\text{F}$  NMR (282 MHz,  $\text{CDCl}_3$ )  $\delta$  -74.68. HRMS (ESI)  $m/z$  412.1485  $[\text{M}+\text{H}]^+$   $\text{C}_{19}\text{H}_{21}\text{F}_3\text{N}_3\text{O}_4^+$  requires 412.1479.

**Compound 5faa:**

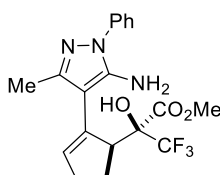

Following general procedure A, product **5faa** was synthesized as orange oil in 27% yield (0.054 mmol, 21.3 mg). Diastereoisomeric ratio (6:1) was determined via  $^1\text{H}$  NMR analysis.

$^1\text{H}$  NMR (300 MHz,  $\text{CDCl}_3$ )  $\delta$  7.53 (dd,  $J = 8.6, 1.4$  Hz, 2H), 7.47 (t,  $J = 7.6$  Hz, 2H), 7.37-7.29 (m, 1H), 5.91 (q,  $J = 2.2$  Hz, 1H), 3.93 (s, 1H), 3.78-3.69 (m, 2H), 3.50 (s, 3H), 2.57 (dddd,  $J = 17.5, 6.4, 5.1, 2.5$  Hz, 1H), 2.49-2.35 (m, 2H), 2.23-2.15 (m, 1H), 2.13 (s, 3H), 2.04-1.87 (m, 1H).  $^{13}\text{C}$  NMR (75 MHz,  $\text{CDCl}_3$ )  $\delta$  170.2 (C), 147.8 (C), 143.4 (C), 138.5 (C), 136.7 (CH), 131.5 (C), 129.5 (CH), 127.3 (CH), 123.8 (CH), 99.5 (C), 78.8 (q,  $J = 27.6$  Hz, C), 53.7 ( $\text{CH}_3$ ), 49.5 (CH), 31.9 ( $\text{CH}_2$ ), 25.0 (q,  $J = 2.5$  Hz,  $\text{CH}_2$ ), 12.7 ( $\text{CH}_3$ ).  $^{19}\text{F}$  NMR (282 MHz,  $\text{CDCl}_3$ )  $\delta$  -74.65. HRMS (ESI)  $m/z$  447,1526  $[\text{M}+\text{H}]^+$   $\text{C}_{19}\text{H}_{21}\text{F}_3\text{N}_3\text{O}_3^+$  requires 396.1530.

• Compound 5gaa:

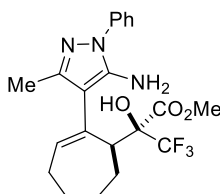

Following general procedure A, product **5gaa** was synthesized as orange oil in 80% yield (0.160 mmol, 68.0 mg). Diastereoisomeric ratio (6:1) was determined via  $^1\text{H}$  NMR analysis.

$^1\text{H}$  NMR (300 MHz,  $\text{CDCl}_3$ )  $\delta$  7.51 (dd,  $J = 8.6, 1.4$  Hz, 2H), 7.48- 7.40 (m, 2H), 7.34-7.28 (m, 1H), 5.94 (dd,  $J = 8.9, 5.2$  Hz, 1H), 4.02 (s, 1H), 3.71 (s, 2H), 3.46 (t,  $J = 6.3$  Hz, 1H), 3.34 (s, 3H), 2.85- 2.66 (m, 1H), 2.21 (s, 3H), 2.18-1.96 (m, 3H), 1.92-1.69 (m, 3H), 1.51-1.36 (m, 1H).  $^{13}\text{C}$  NMR (101 MHz,  $\text{CDCl}_3$ )  $\delta$  171.1 (C), 147.2 (C), 142.4 (C), 138.6 (C), 136.5 (CH), 130.0 (C), 129.5 (CH), 127.0 (CH), 123.6 (q,  $J = 288.0$  Hz,  $\text{CF}_3$ ), 123.3 (CH), 107.3 (C), 80.7 (q,  $J = 28.2$  Hz, C), 53.5 ( $\text{CH}_3$ ), 47.0 (CH), 26.7 ( $\text{CH}_2$ ), 26.4 ( $\text{CH}_2$ ), 26.1 ( $\text{CH}_2$ ), 24.6 ( $\text{CH}_2$ ), 13.4 ( $\text{CH}_3$ ).  $^{19}\text{F}$  NMR (282 MHz,  $\text{CDCl}_3$ )  $\delta$  -73.52. HRMS (ESI)  $m/z$  424.1849  $[\text{M}+\text{H}]^+$   $\text{C}_{21}\text{H}_{25}\text{F}_3\text{N}_3\text{O}_3^+$  requires 424.1843.

• Compound 5aba:

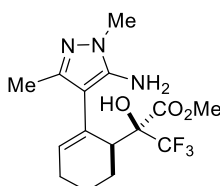

Following general procedure A, product **5aba** was synthesized as yellow solid in 46% yield (0.092 mmol, 32.2 mg) (m. p.= 99-107 °C). Diastereoisomeric ratio (4:1) was determined via  $^1\text{H}$  NMR analysis.

$^1\text{H}$  NMR (400 MHz,  $\text{CDCl}_3$ )  $\delta$  5.75 (td,  $J = 3.9, 1.3$  Hz, 1H), 3.98 (s, 1H), 3.56 (s, 3H), 3.48-3.36 (m, 5H), 3.27 (tq,  $J = 5.3, 1.8$  Hz, 1H), 2.21-2.12(m, 2H), 2.04 (s, 3H), 2.02-1.93 (m, 2H), 1.91-1.80 (m, 1H), 1.59 (tdq,  $J = 9.0, 5.9, 2.8$  Hz, 1H).  $^{13}\text{C}$  NMR (75 MHz,  $\text{CDCl}_3$ )  $\delta$  170.7 (C), 145.3 (C), 143.1 (C), 134.9(CH),126.7 (C), 123.75 (q,  $J = 289.1$  Hz,  $\text{CF}_3$ ), 105.1 (C), 79.6 (q,  $J = 27.4$  Hz, C), 53.7 ( $\text{CH}_3$ ), 40.6 (CH), 34.1 ( $\text{CH}_3$ ), 25.5 ( $\text{CH}_2$ ), 24.7 (q,  $J = 2.3$  Hz,  $\text{CH}_2$ ), 19.1 ( $\text{CH}_2$ ), 12.6 ( $\text{CH}_3$ ).  $^{19}\text{F}$  NMR (282 MHz,  $\text{CDCl}_3$ )  $\delta$  -73.55. HRMS (ESI)  $m/z$  348.1531  $[\text{M}+\text{H}]^+$   $\text{C}_{15}\text{H}_{20}\text{F}_3\text{N}_3\text{O}_3^+$  requires 348.1530.

• Compound 5aca:

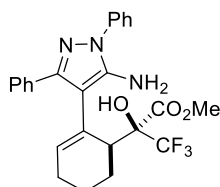

Following general procedure A, product **5aca** was synthesized as yellow solid in 41% yield (0.082 mmol, 39.3 mg) (mp 186–200 °C). Diastereoisomeric ratio (6:1) was determined via  $^1\text{H}$  NMR analysis.

**<sup>1</sup>H NMR (300 MHz, CDCl<sub>3</sub>)** δ 7.84-7.77 (m, 2H), 7.64 (dd, *J* = 8.5, 1.2 Hz, 2H), 7.50 (t, *J* = 7.7 Hz, 2H), 7.43-7.28 (m, 4H), 6.13 (td, *J* = 3.8, 1.1 Hz, 1H), 4.05 (s, 1H), 3.83 (s, 2H), 3.48 (s, 3H), 3.11 (s, 1H), 2.36-2.28 (m, 2H), 2.17-1.94 (m, 2H), 1.88-1.60 (m, 2H). **<sup>13</sup>C NMR (126 MHz, CDCl<sub>3</sub>)** δ 170.9 (C), 148.5 (C), 144.1 (C), 138.7 (C), 135.5 (CH), 133.8 (C), 129.6 (CH), 128.4 (CH), 127.8 (CH), 127.6 (CH), 127.4 (C), 126.3 (CH), 124.1 (CH), 123.6 (q, *J* = 288.9 Hz, CF<sub>3</sub>), 103.3 (C), 79.6 (q, *J* = 27.7 Hz, C), 53.9 (CH<sub>3</sub>), 40.2 (CH), 25.8 (CH<sub>2</sub>), 24.9 (q, *J* = 1.8 Hz, CH<sub>2</sub>), 18.4 (CH<sub>2</sub>). **<sup>19</sup>F NMR (282 MHz, CDCl<sub>3</sub>)** δ -73.71. **HRMS (ESI)** *m/z* 348.1531 [M+H]<sup>+</sup> C<sub>15</sub>H<sub>20</sub>F<sub>3</sub>N<sub>3</sub>O<sub>3</sub><sup>+</sup> requires 348.1530.

• **Compound 5ada:**

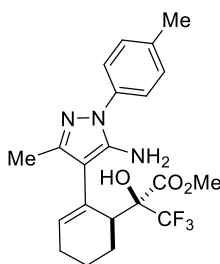

Following general procedure A, product **5ada** was synthesized as yellow solid in 45% yield (0.09 mmol, 38.2 mg) (mp 163–167 °C). Diastereoisomeric ratio (7:1) was determined via <sup>1</sup>H NMR analysis.

**<sup>1</sup>H NMR (300 MHz, CDCl<sub>3</sub>)** δ 7.39 (d, *J* = 8.3 Hz, 2H), 7.25 (d, *J* = 8.0 Hz, 2H), 5.88 (td, *J* = 3.9, 1.4 Hz, 1H), 4.07 (s, 1H), 3.70 (s, 2H), 3.53 (s, 3H), 3.37-3.30 (m, 1H), 2.39 (s, 3H), 2.19 (dd, *J* = 6.2, 3.6 Hz, 2H), 2.12 (s, 3H), 2.07-1.84 (m, 3H), 1.73-1.55 (m, 1H). **<sup>13</sup>C NMR (126 MHz, CDCl<sub>3</sub>)** δ 170.6 (C), 147.3 (C), 143.1 (C), 137.3 (C), 136.0 (C), 135.5 (CH), 130.1 (CH), 126.4 (C), 123.9 (CH), 123.8 (q, *J* = 288.8 Hz, CF<sub>3</sub>), 104.3 (C), 79.7 (q, *J* = 27.3 Hz, C), 53.8 (CH<sub>3</sub>), 40.8 (CH), 25.6 (CH<sub>2</sub>), 24.7 (q, *J* = 2.4 Hz, CH<sub>2</sub>), 21.1 (CH<sub>3</sub>), 19.4 (CH<sub>2</sub>), 12.6 (CH<sub>3</sub>). **<sup>19</sup>F NMR (282 MHz, CDCl<sub>3</sub>)** δ -73.51. **HRMS (ESI)** *m/z* 424.1839 [M+H]<sup>+</sup> C<sub>21</sub>H<sub>25</sub>F<sub>3</sub>N<sub>3</sub>O<sub>3</sub><sup>+</sup> requires 424.1843.

## 5. Characterization of product 7

### • Compound 7:

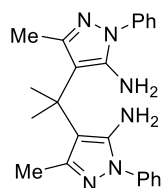

Following procedure iv, product **7** was synthesized as a colorless oil in 37% yield (0.93 mmol, 360 mg).

**<sup>1</sup>H NMR (300 MHz, CDCl<sub>3</sub>)** δ 7.50-7.38 (m, 8H), 7.35-7.25 (m, 2H), 3.61 (s, 4H), 2.34 (s, 6H), 1.72 (s, 6H). **<sup>13</sup>C NMR (75 MHz, CDCl<sub>3</sub>)** δ 146.4 (C), 142.4 (C), 138.4 (C), 129.4 (CH), 127.2 (CH), 124.0 (CH), 106.9 (C), 33.7 (C), 29.4 (CH<sub>3</sub>), 16.1 (CH<sub>3</sub>). **HRMS (ESI)** m/z 387.2300 [M+H]<sup>+</sup> C<sub>23</sub>H<sub>27</sub>N<sub>6</sub><sup>+</sup> requires 387.2292.

## 6. Asymmetric reactions

*Scheme S.1 - Optimization of the organocatalyst.*

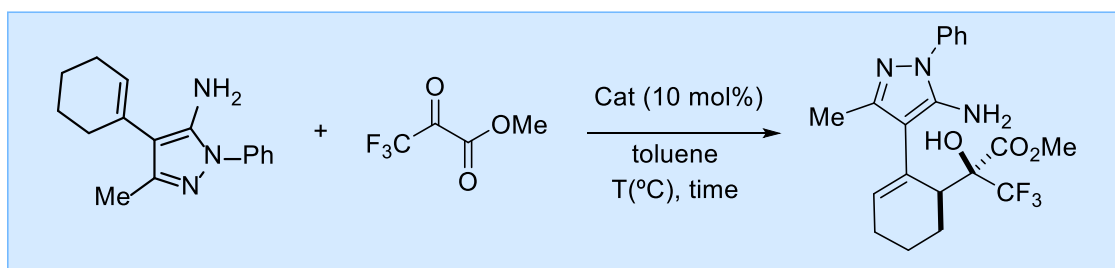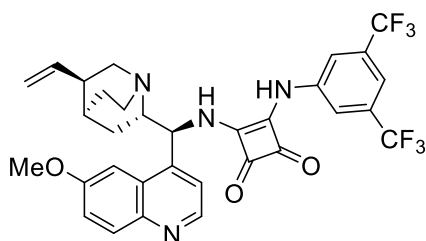

rt, 5 dies, 30% yield, 6:1 dr, 0% ee  
50°C, 1 day, 52% yield, 7:1 dr, 0% ee

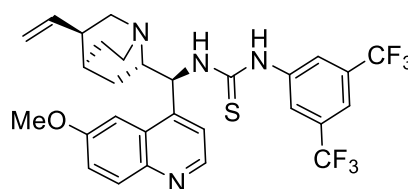

50°C, 3 days, 58% yield, 7:1 dr, 0% ee

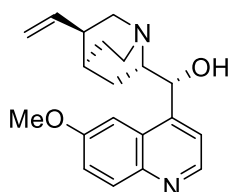

50°C, 3 days, 51% yield, 6:1 dr, 0% ee

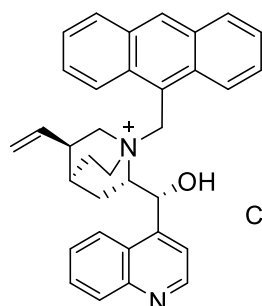

50°C, 3 days, 55%, 7:1 dr, 0% ee

## 7. NMR data

### • Compound 3aa:

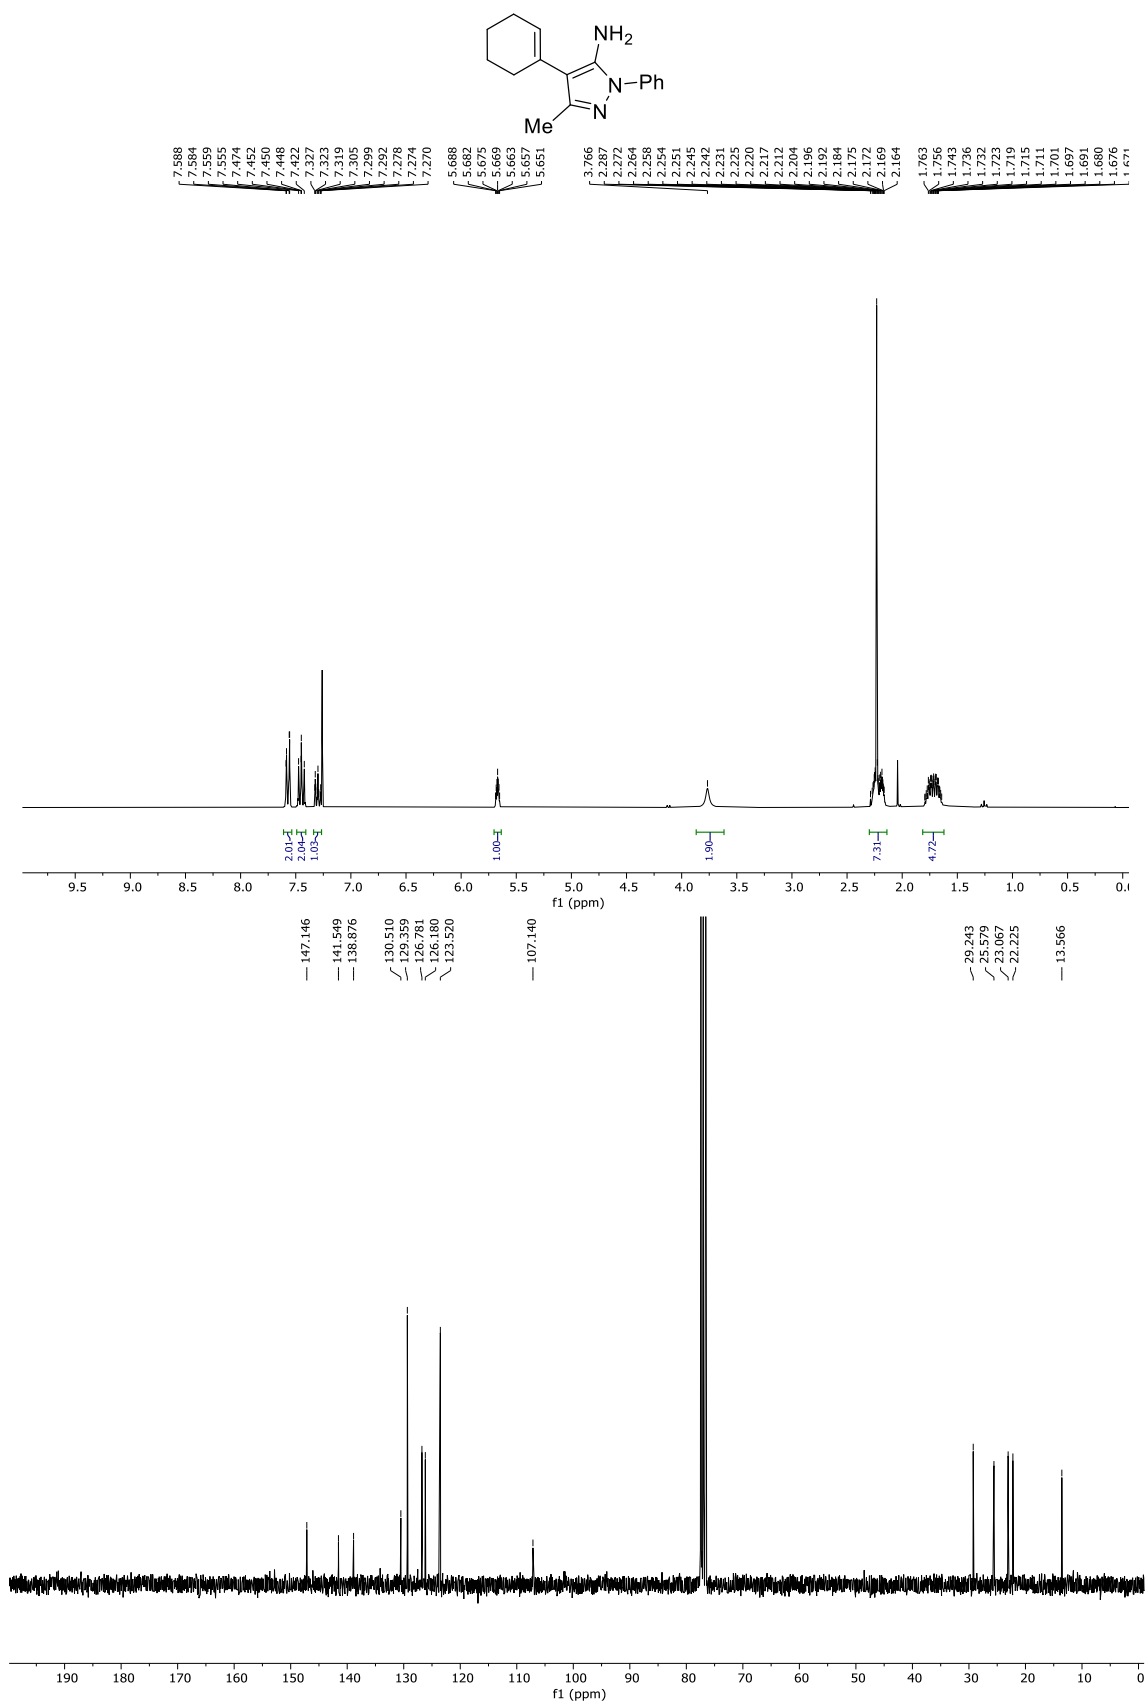



**Compound 3ba:**

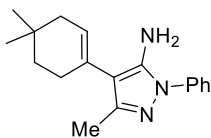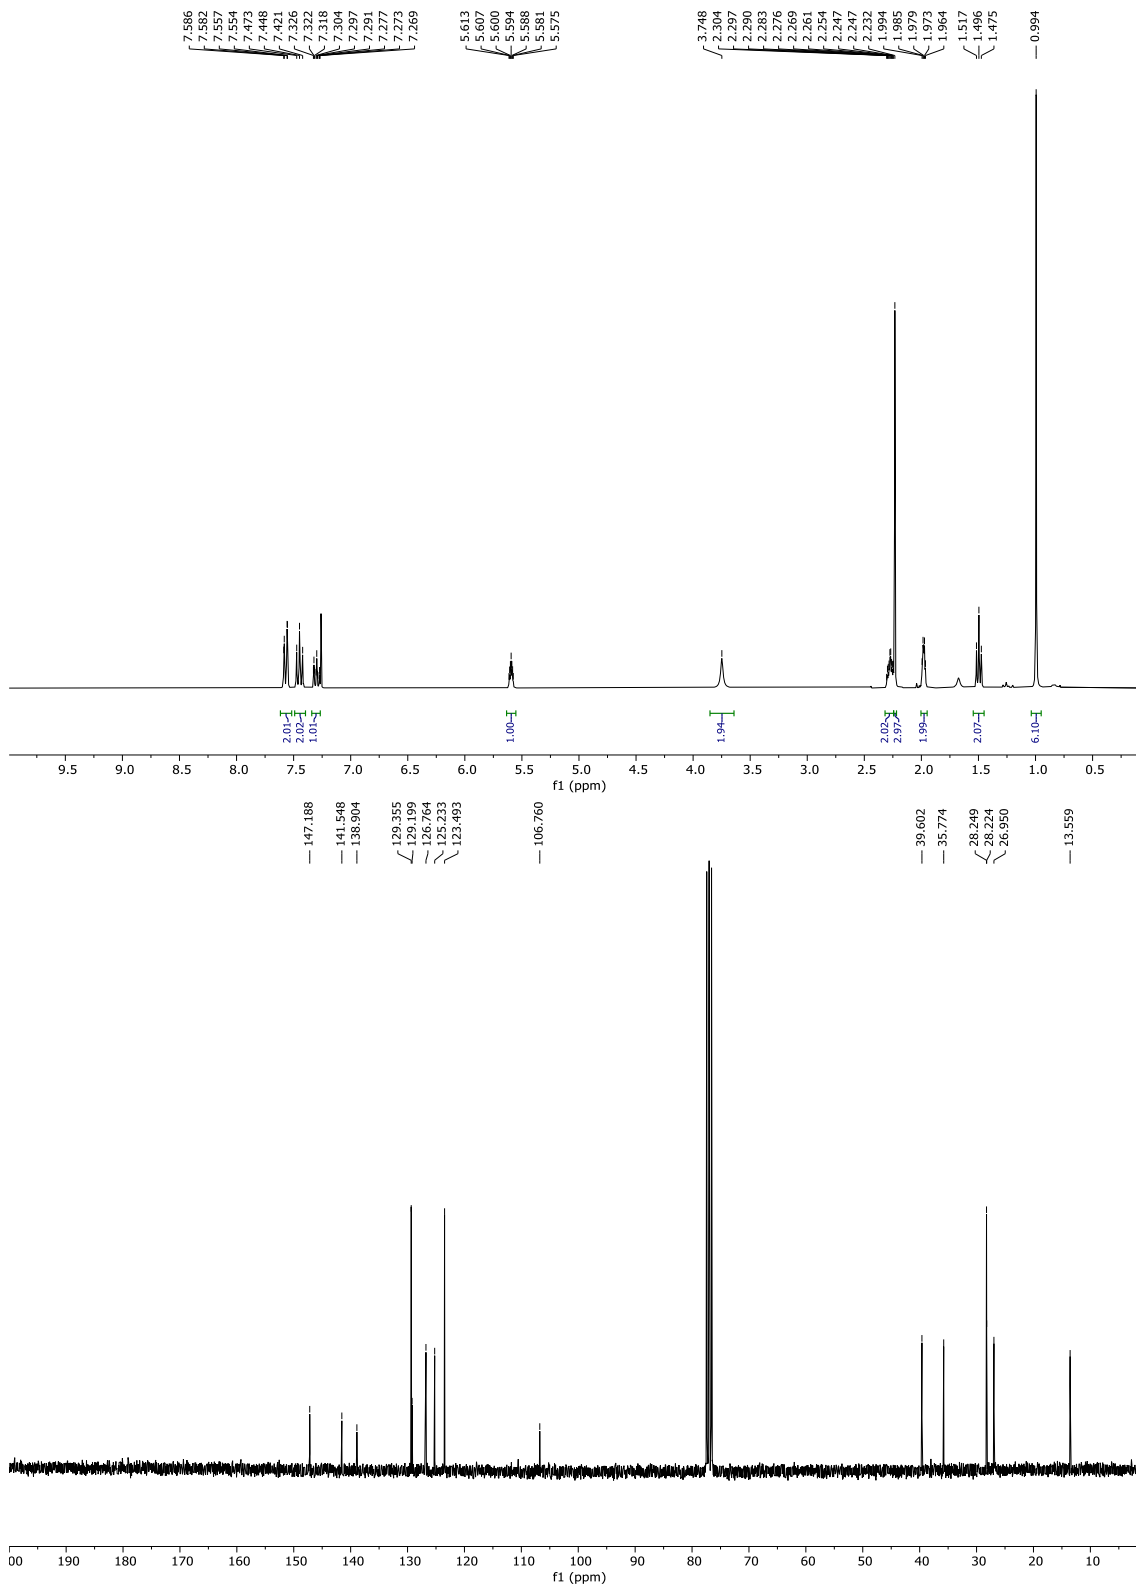

**Compound 3ca:**

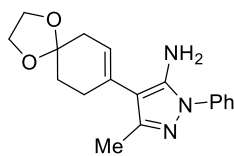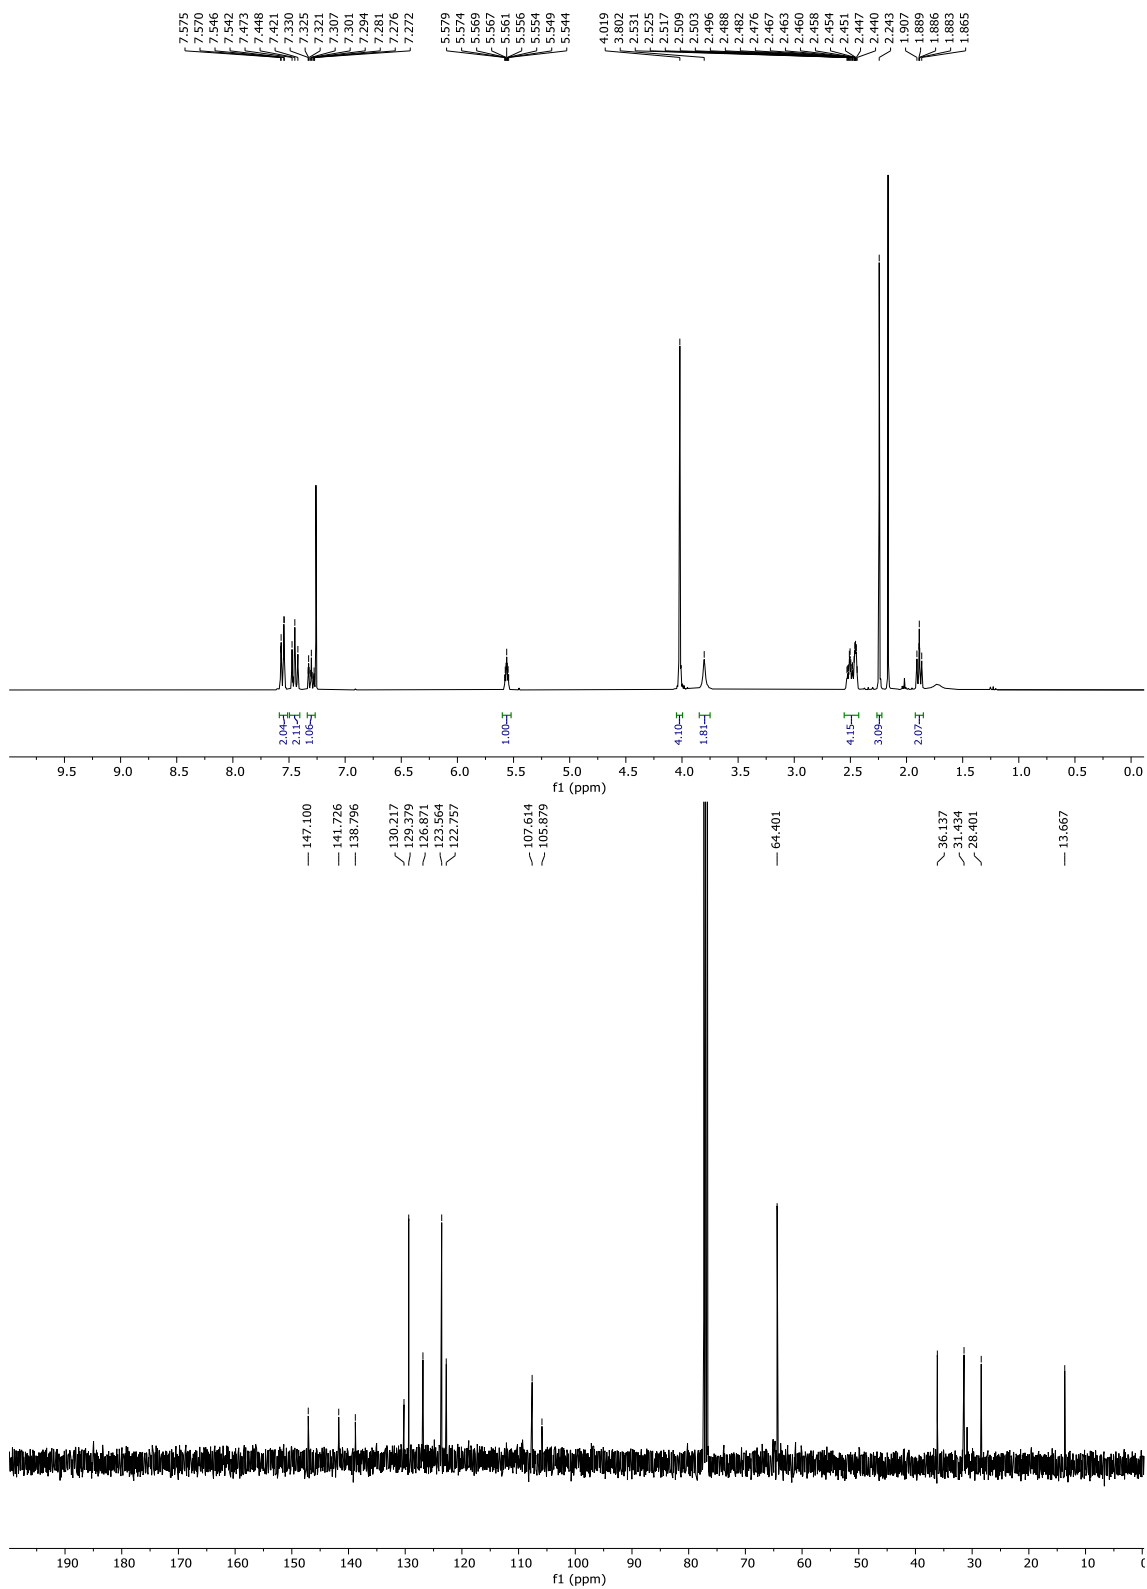

**Compound 3da:**

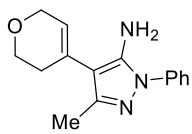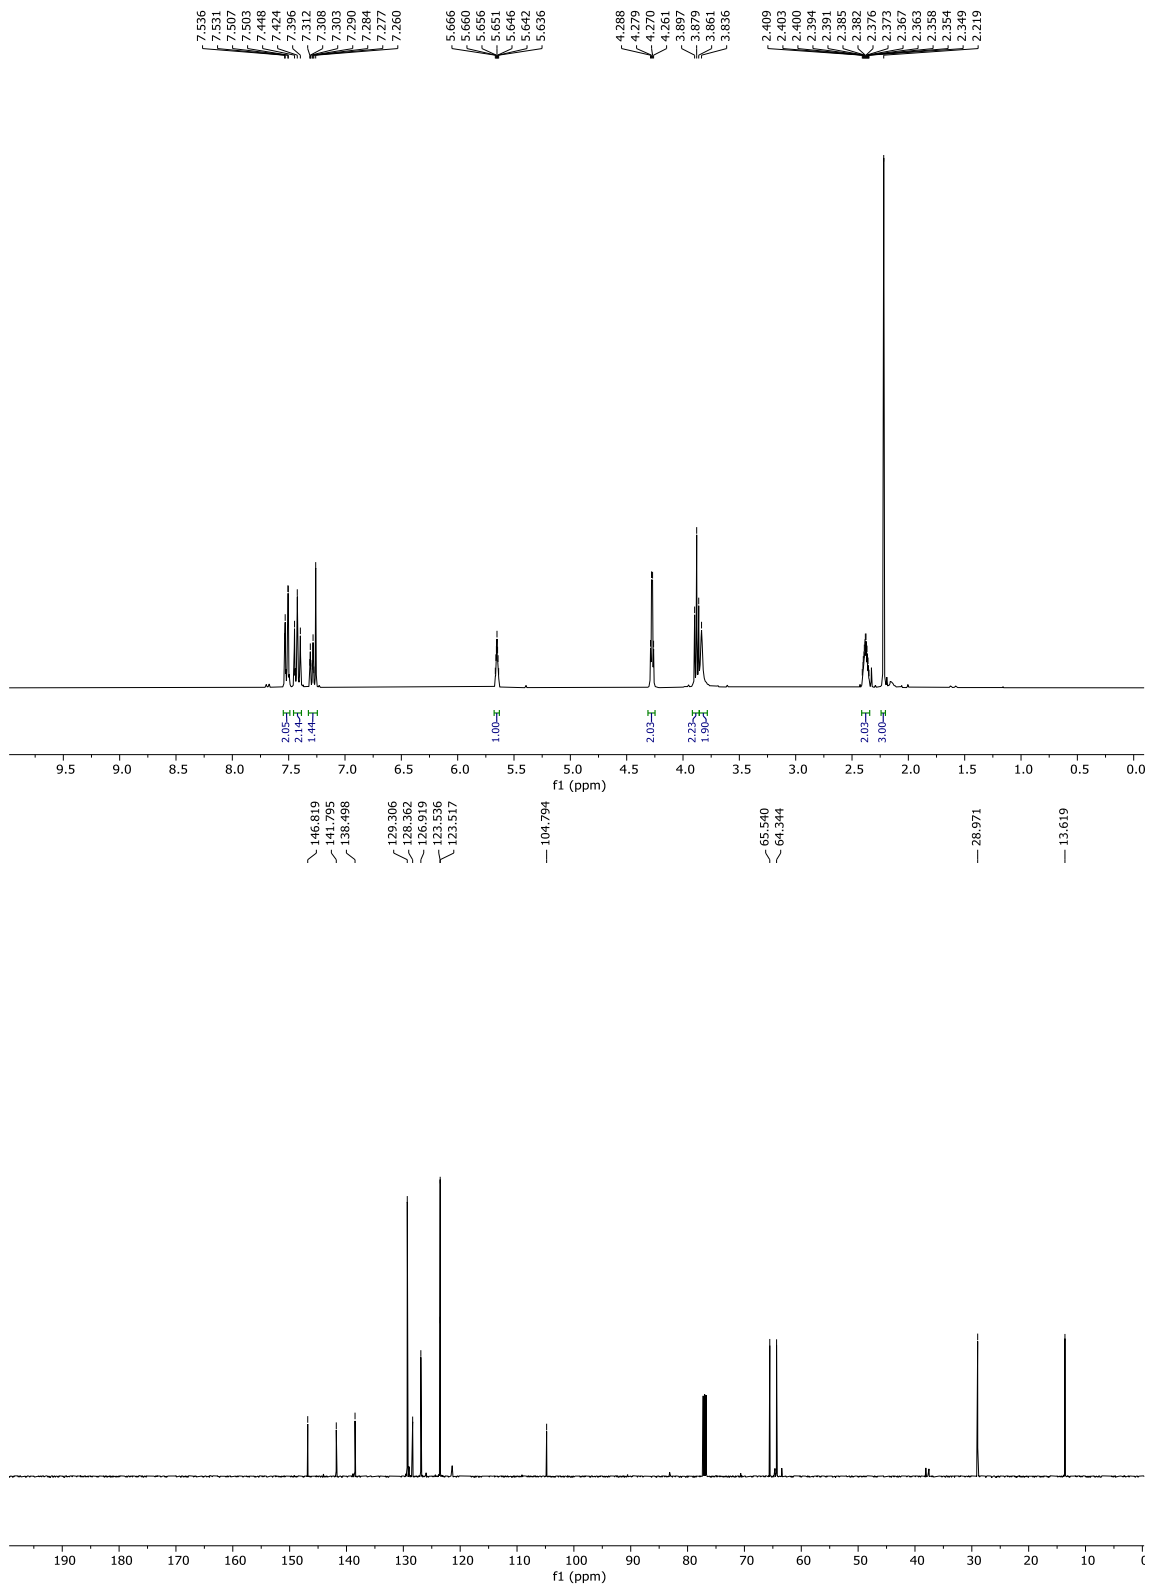

**Compound 3ea:**

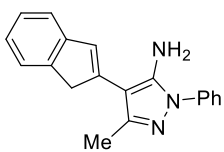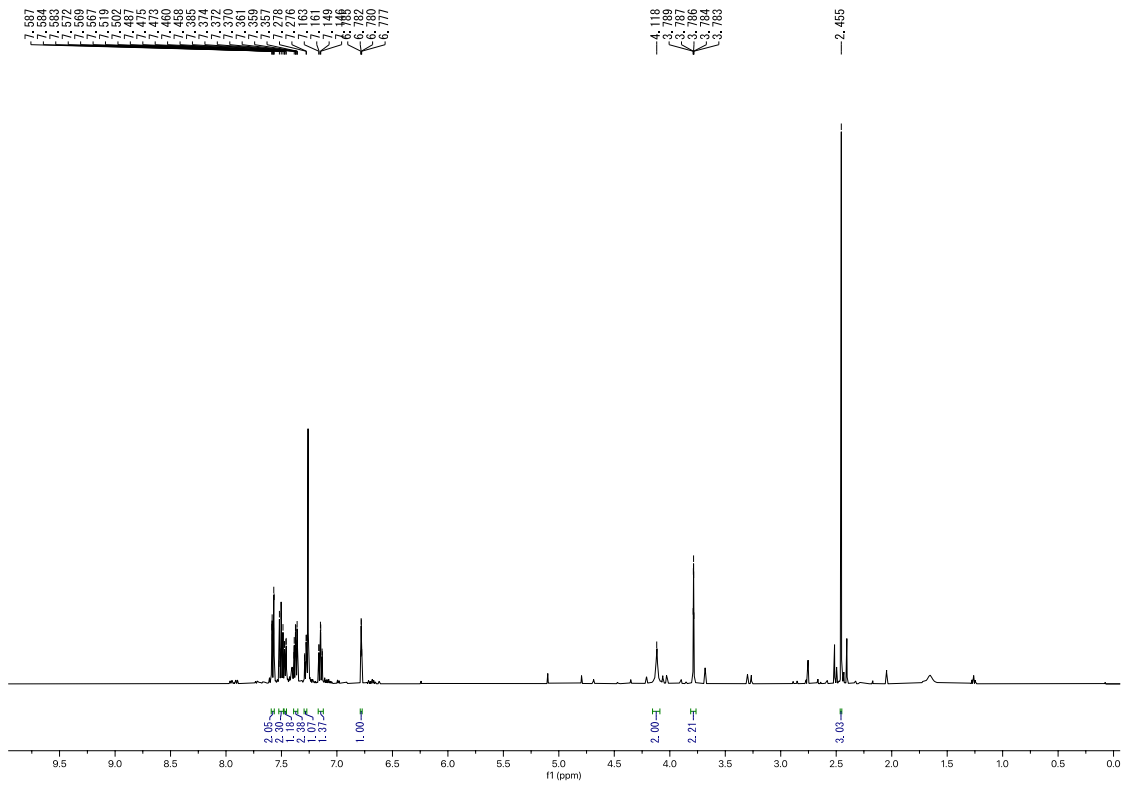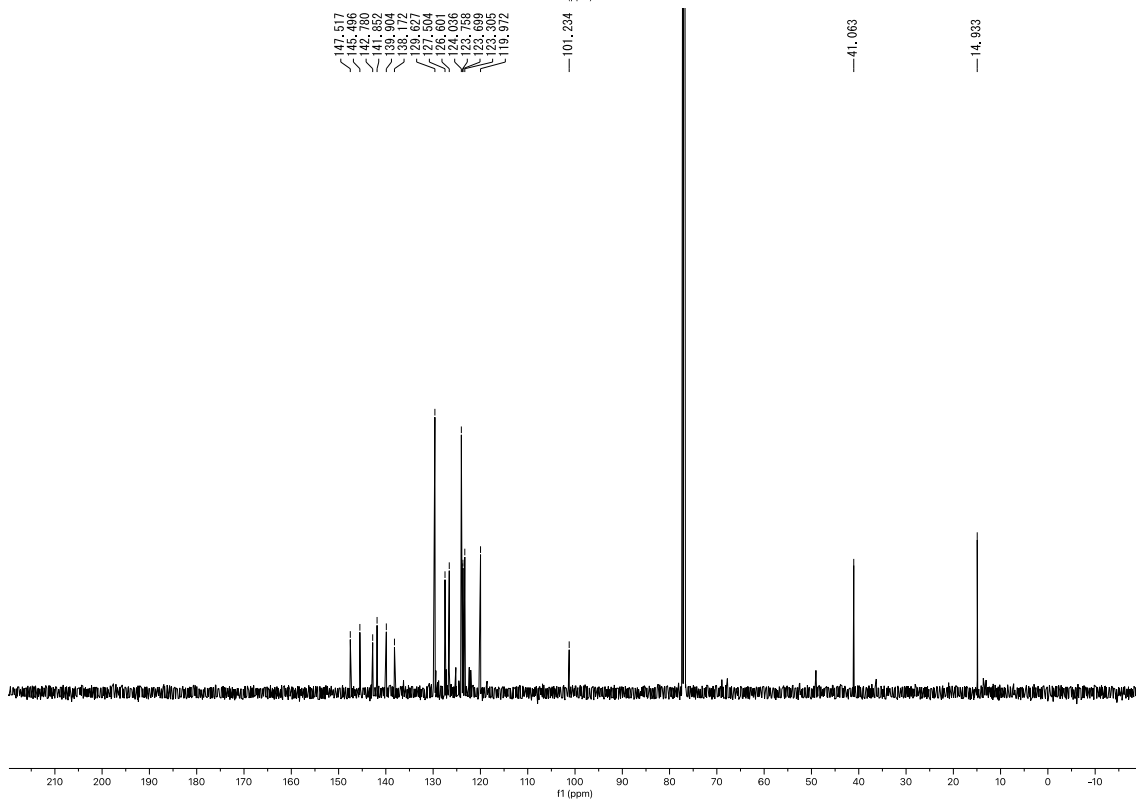

**Compound 3fa:**

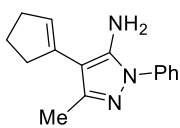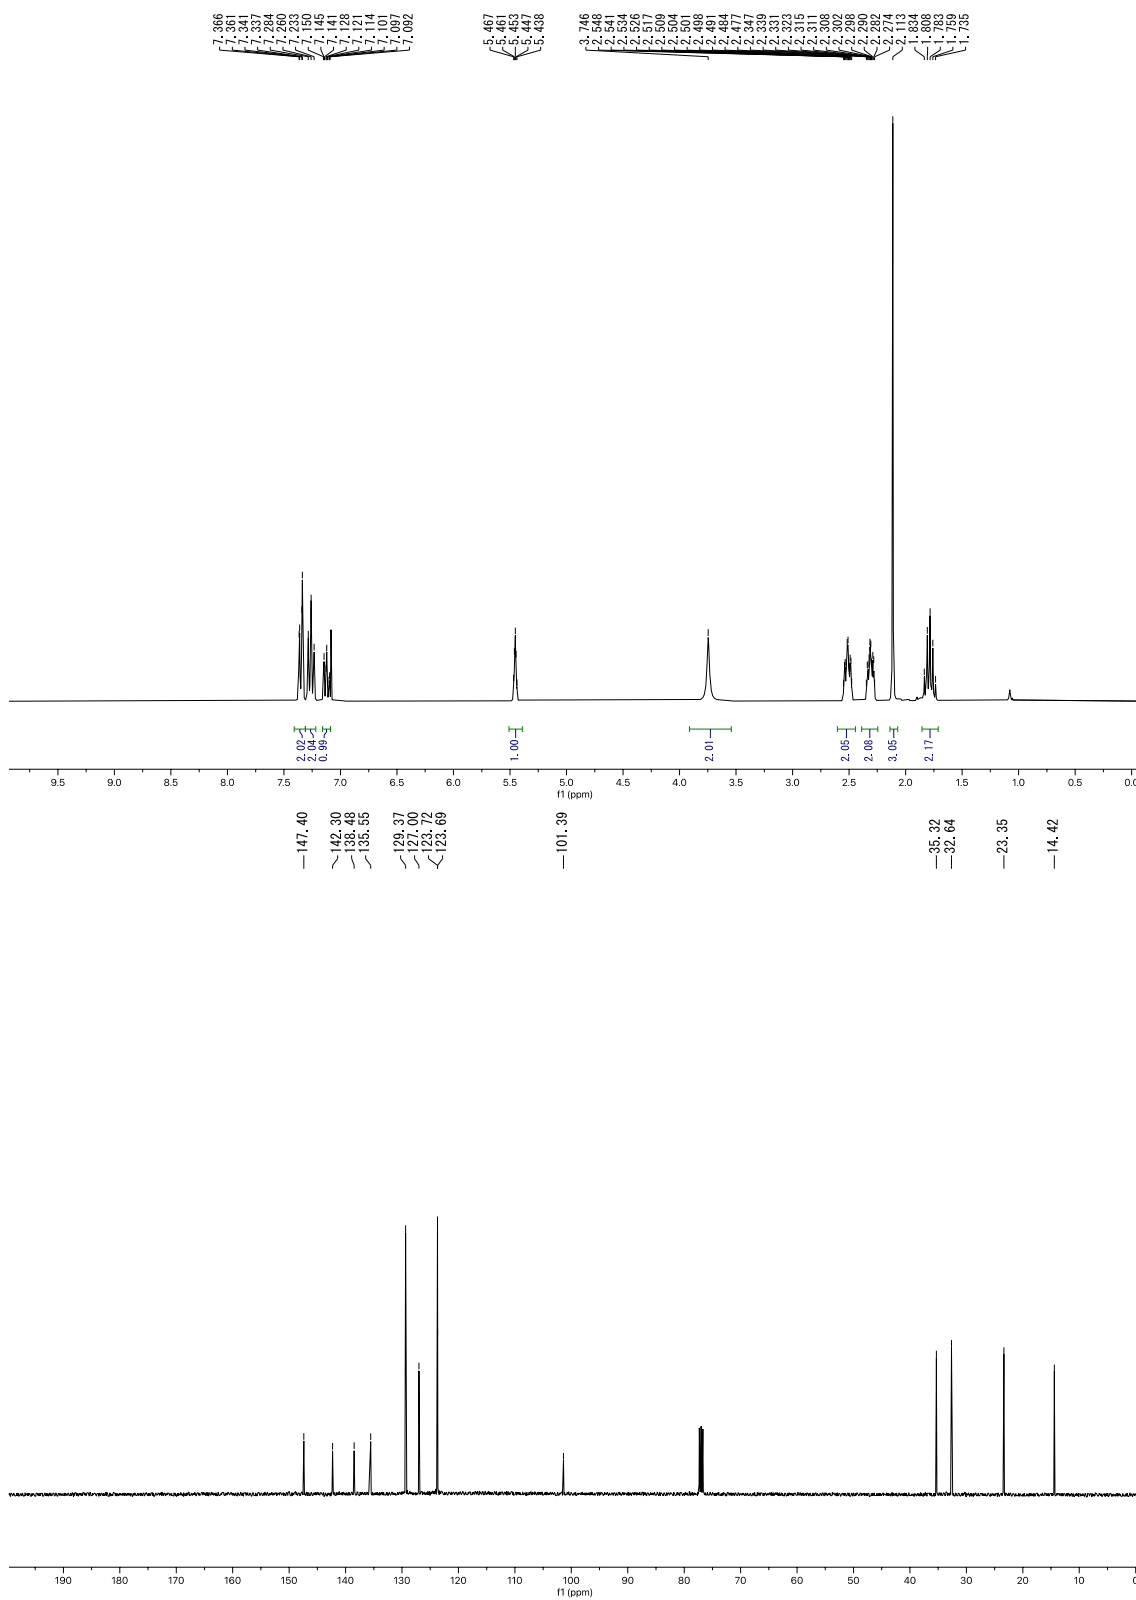

• Compound 3ga:

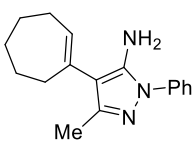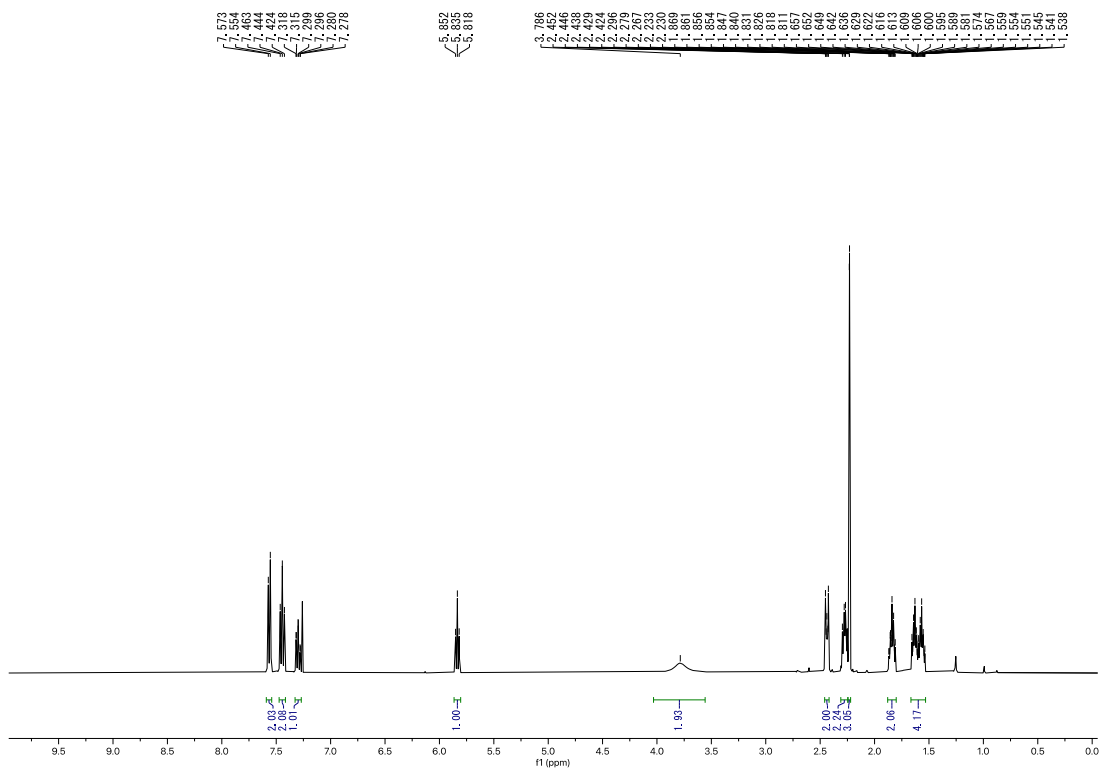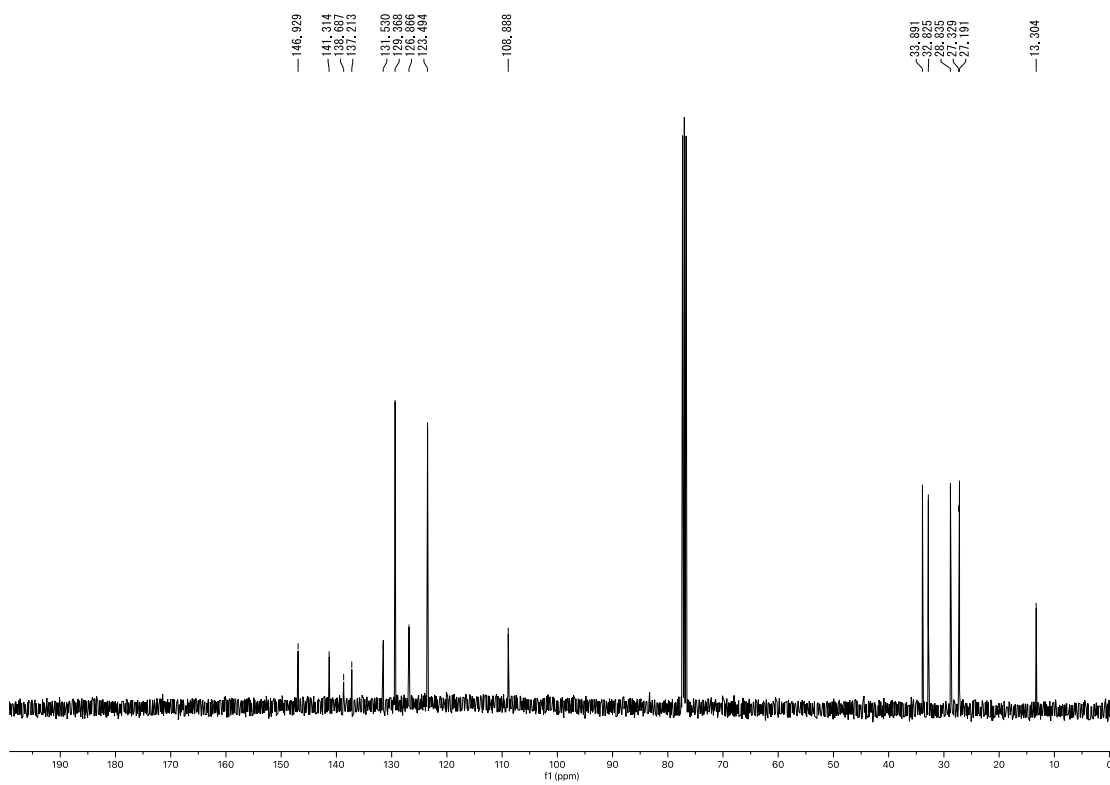

**Compound 3ab:**

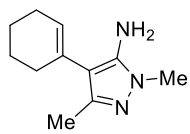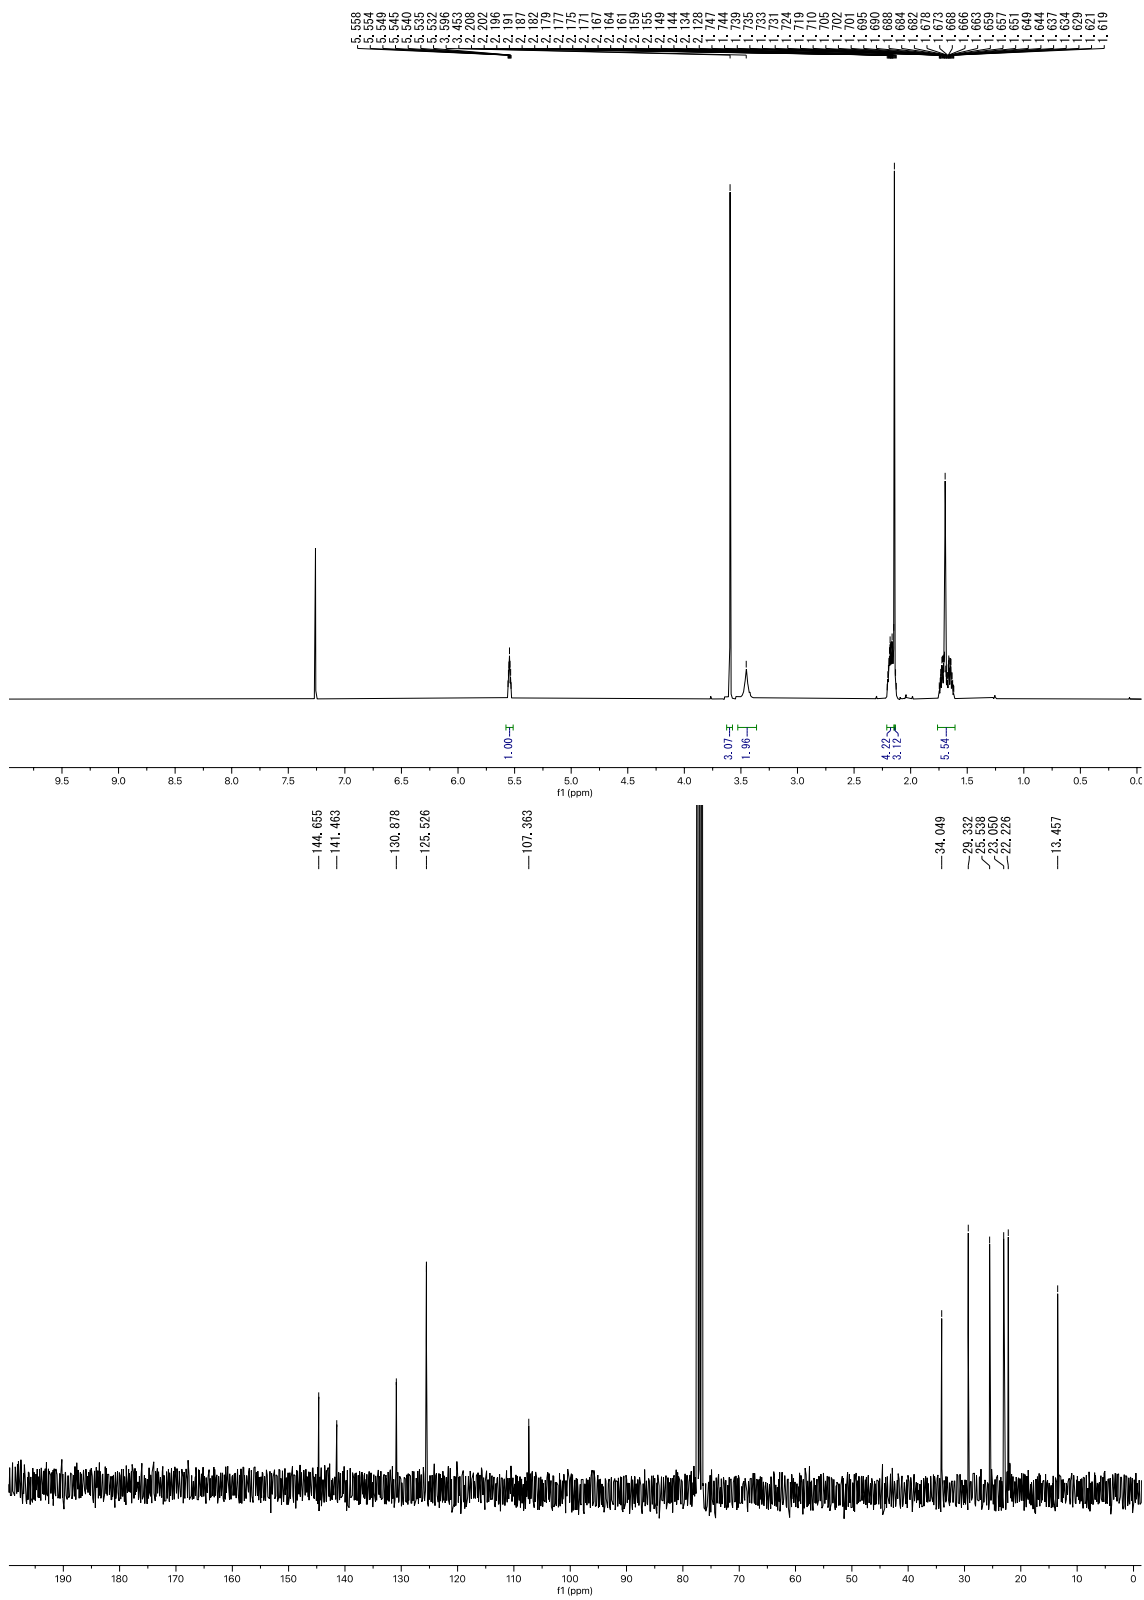

**Compound 3ac:**

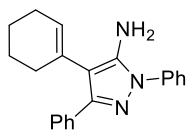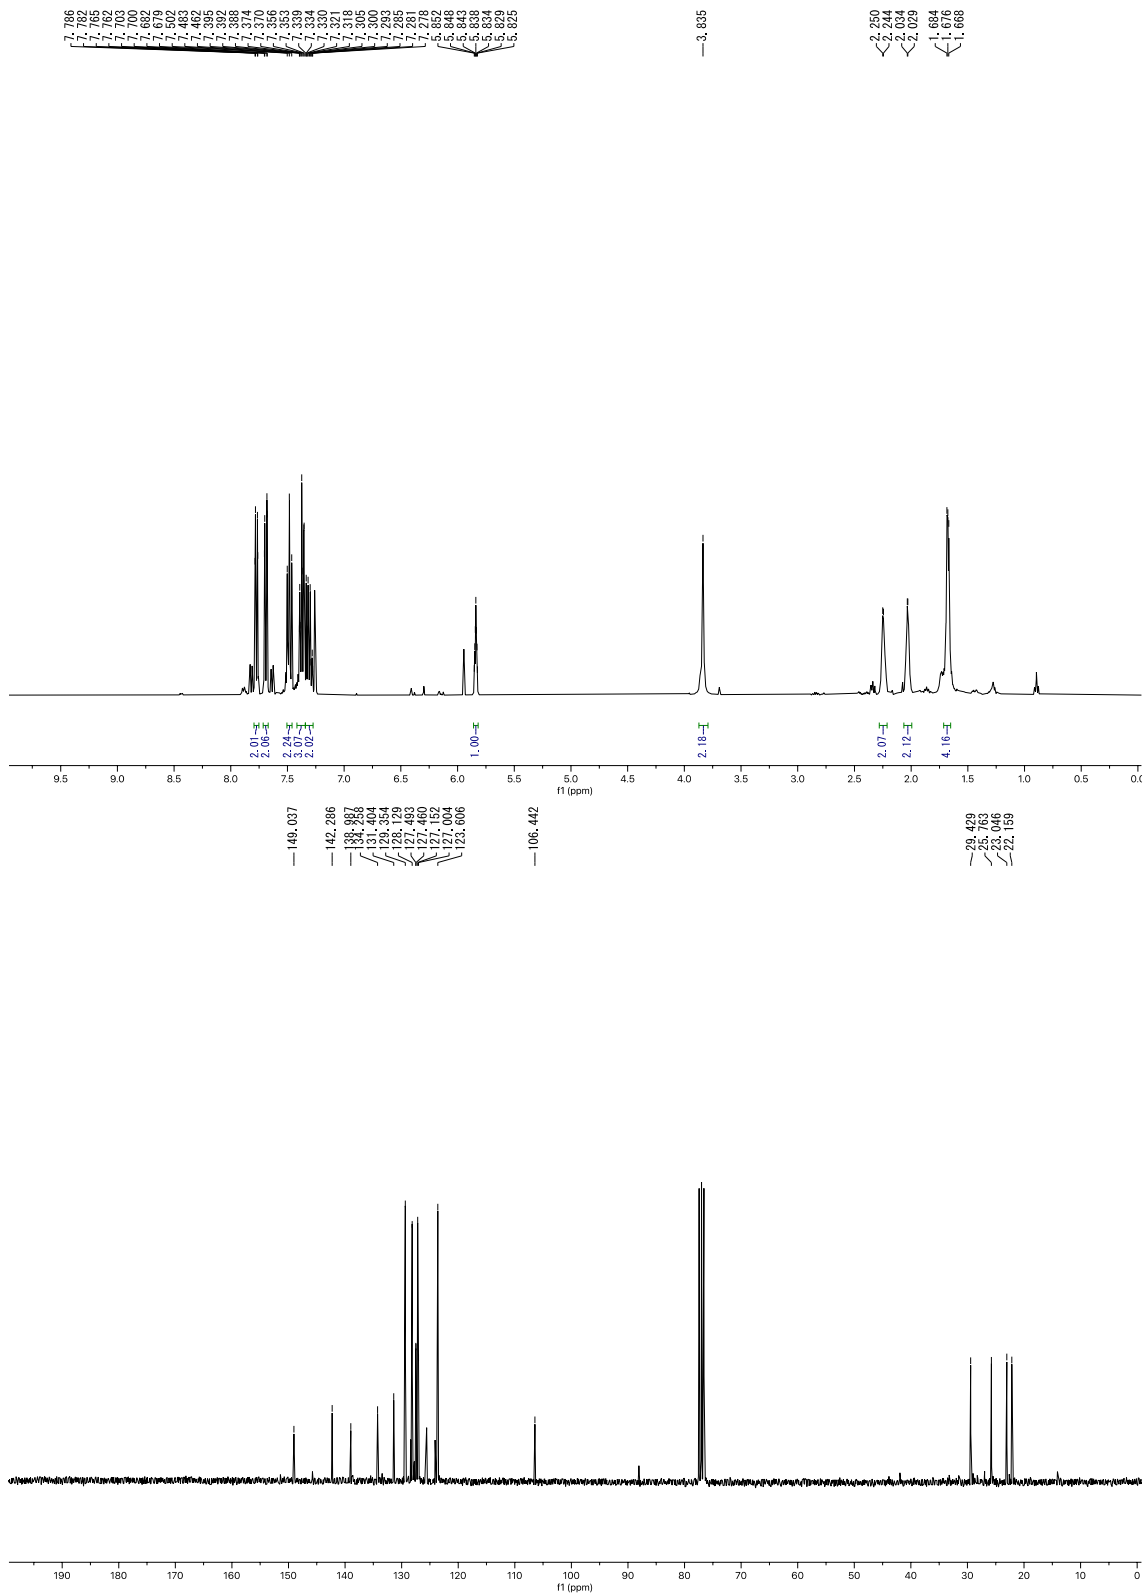



**Compound 3ad:**

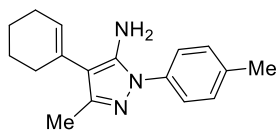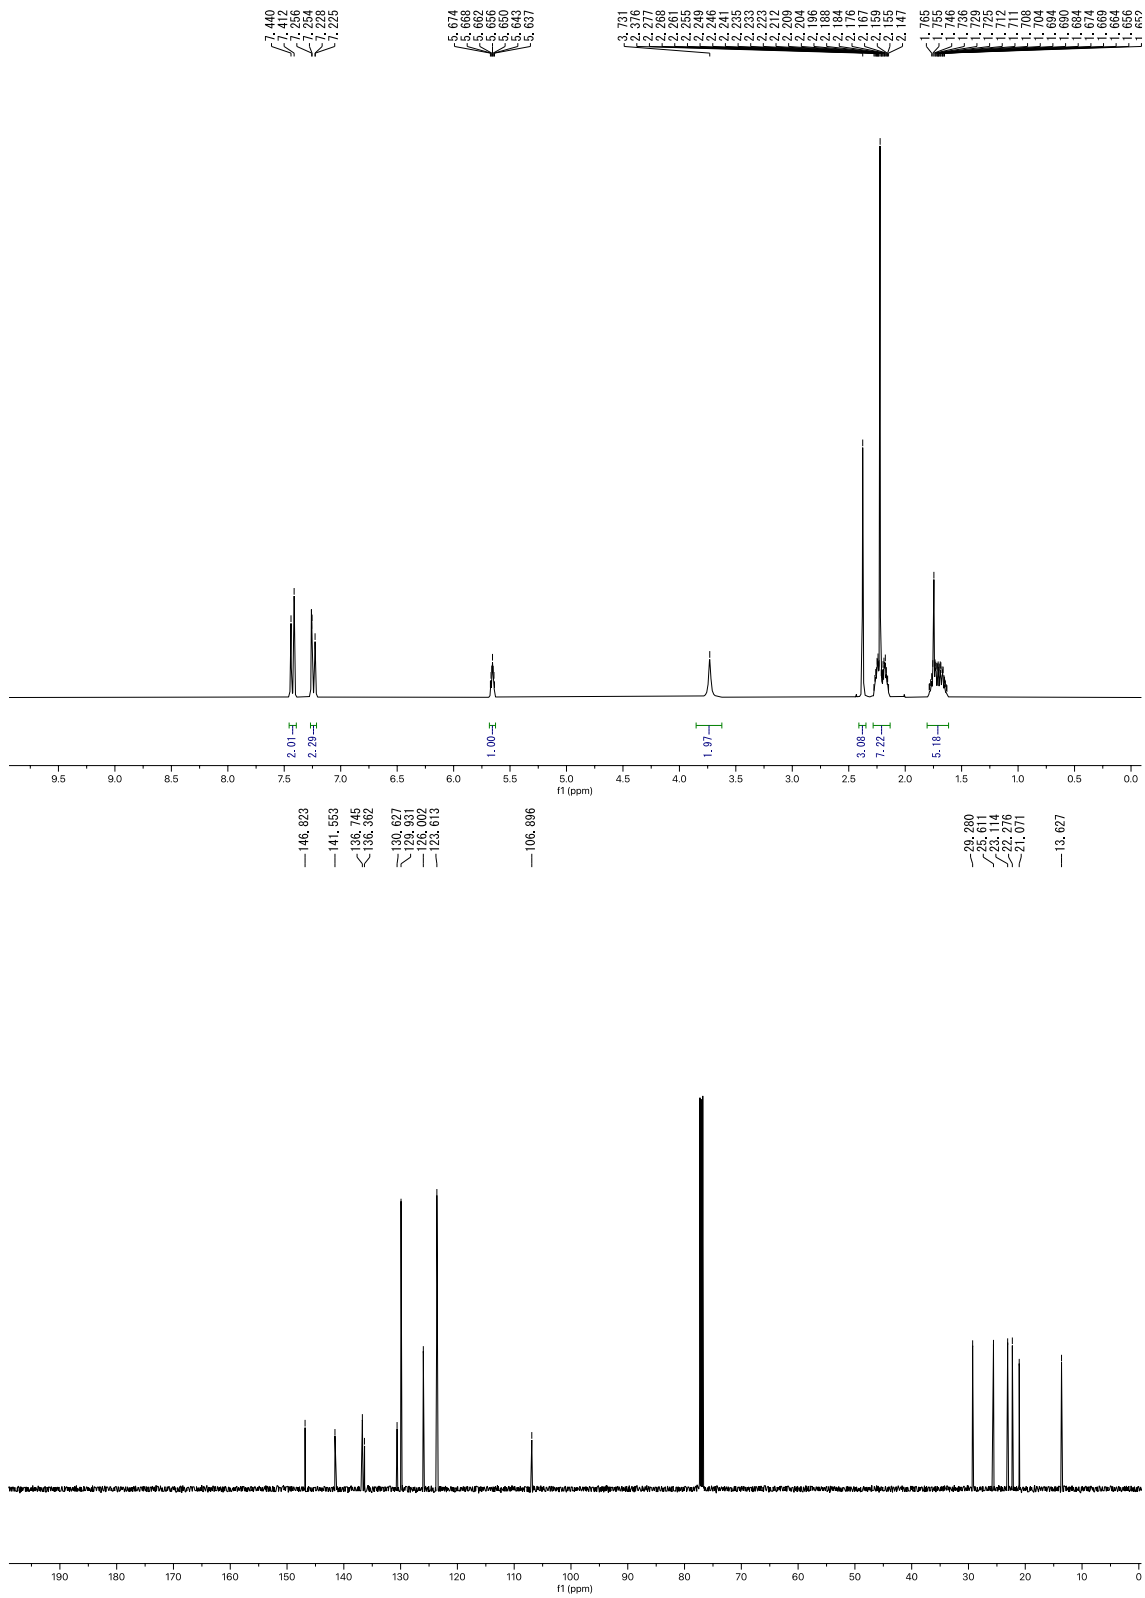

**Compound 5aaa:**

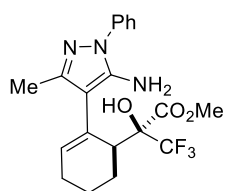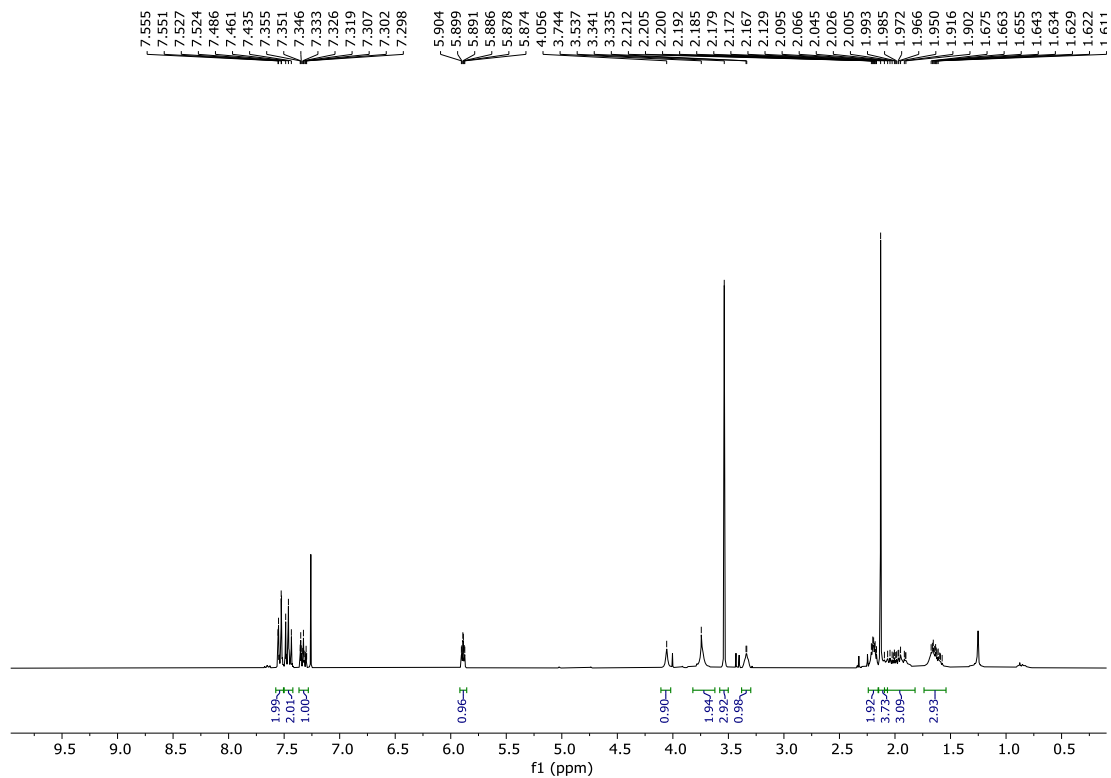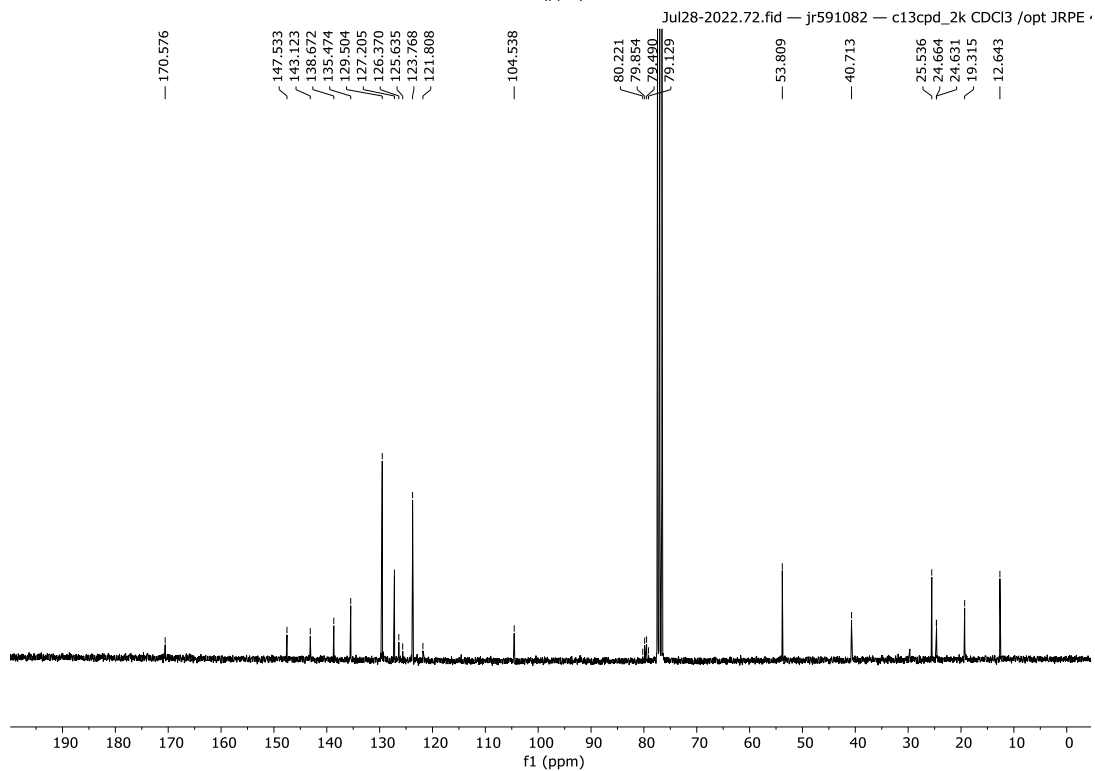

**Compound 5aab:**

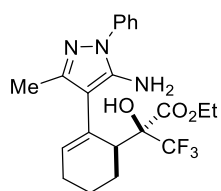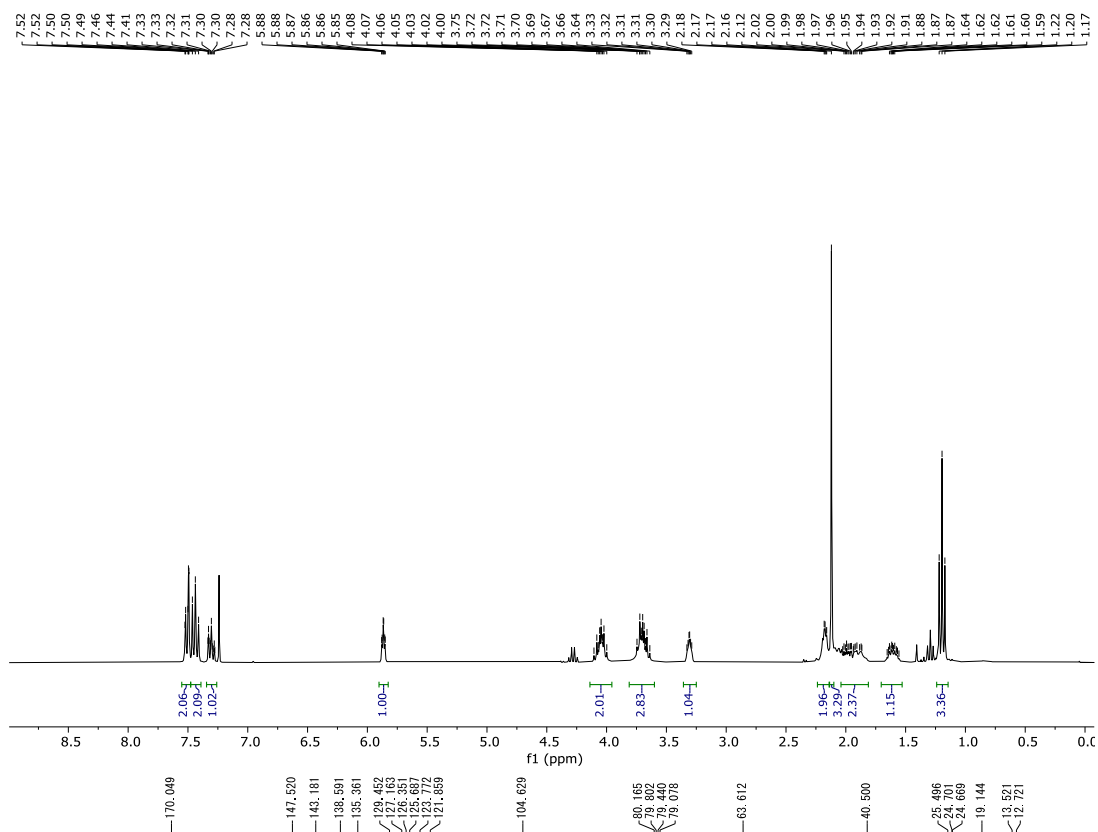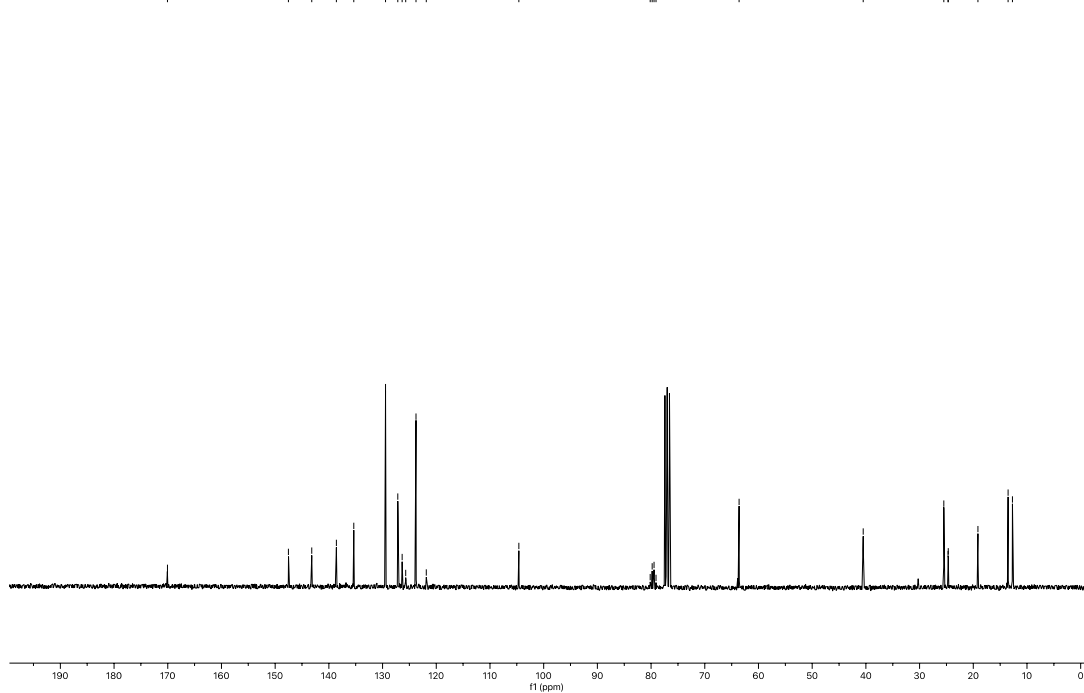

**Compound 5baa:**

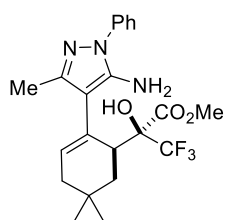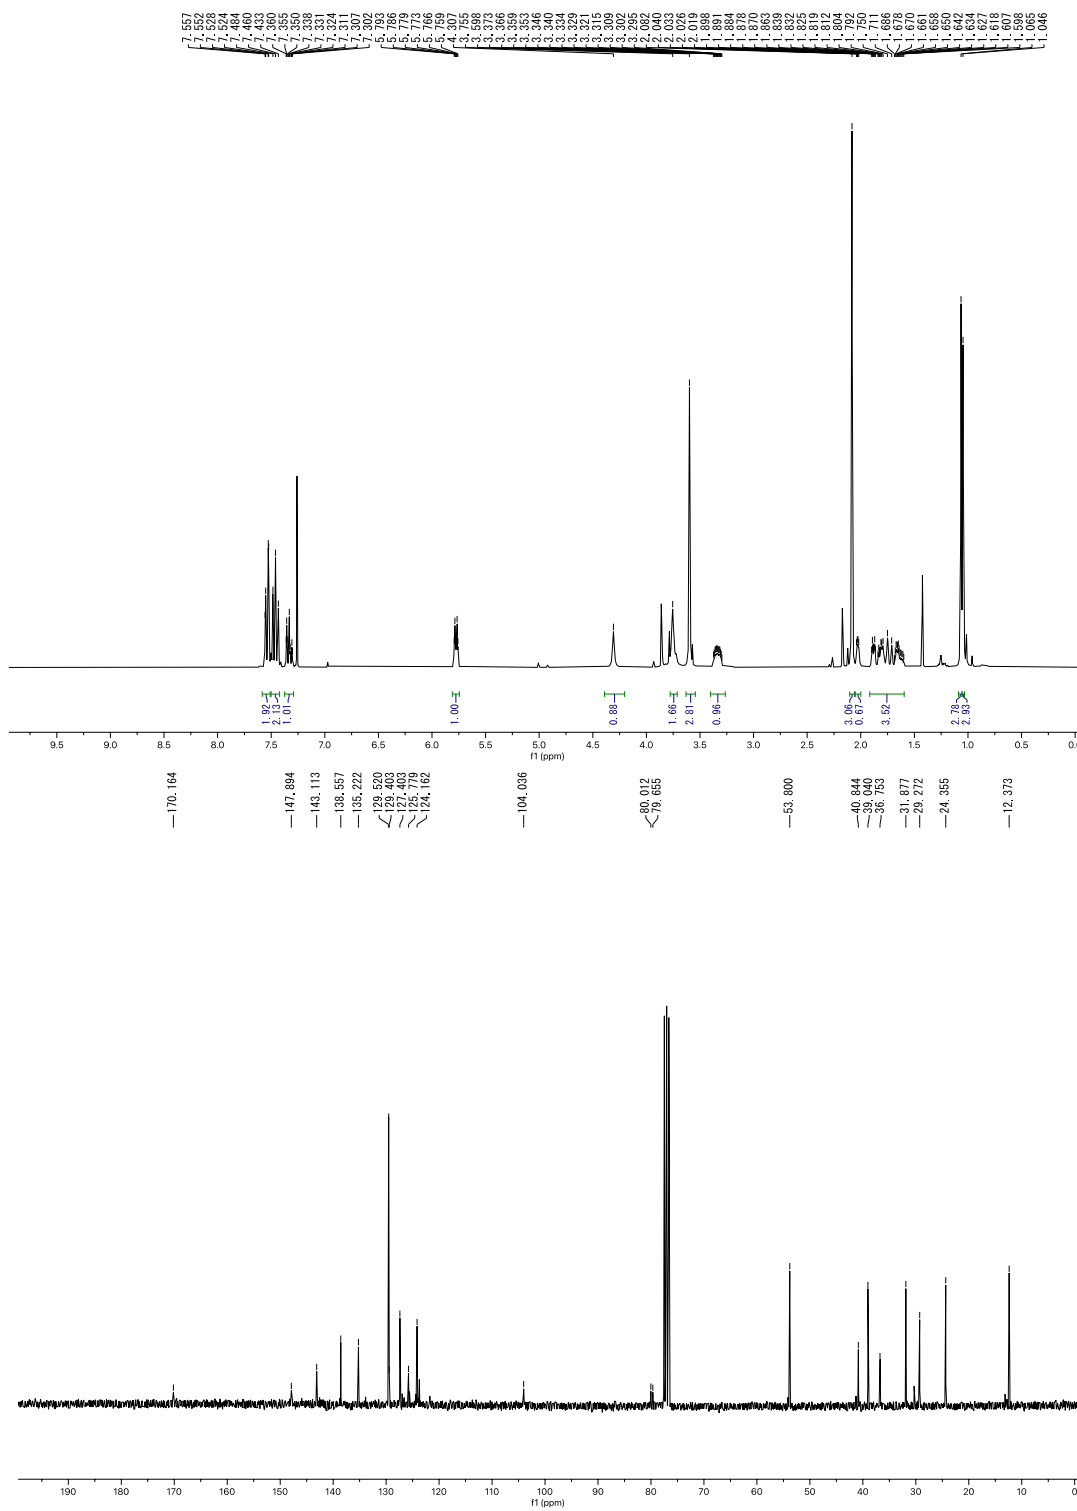

• Compound 5caa:

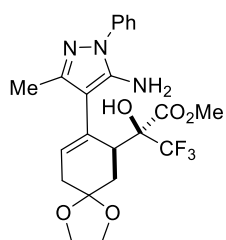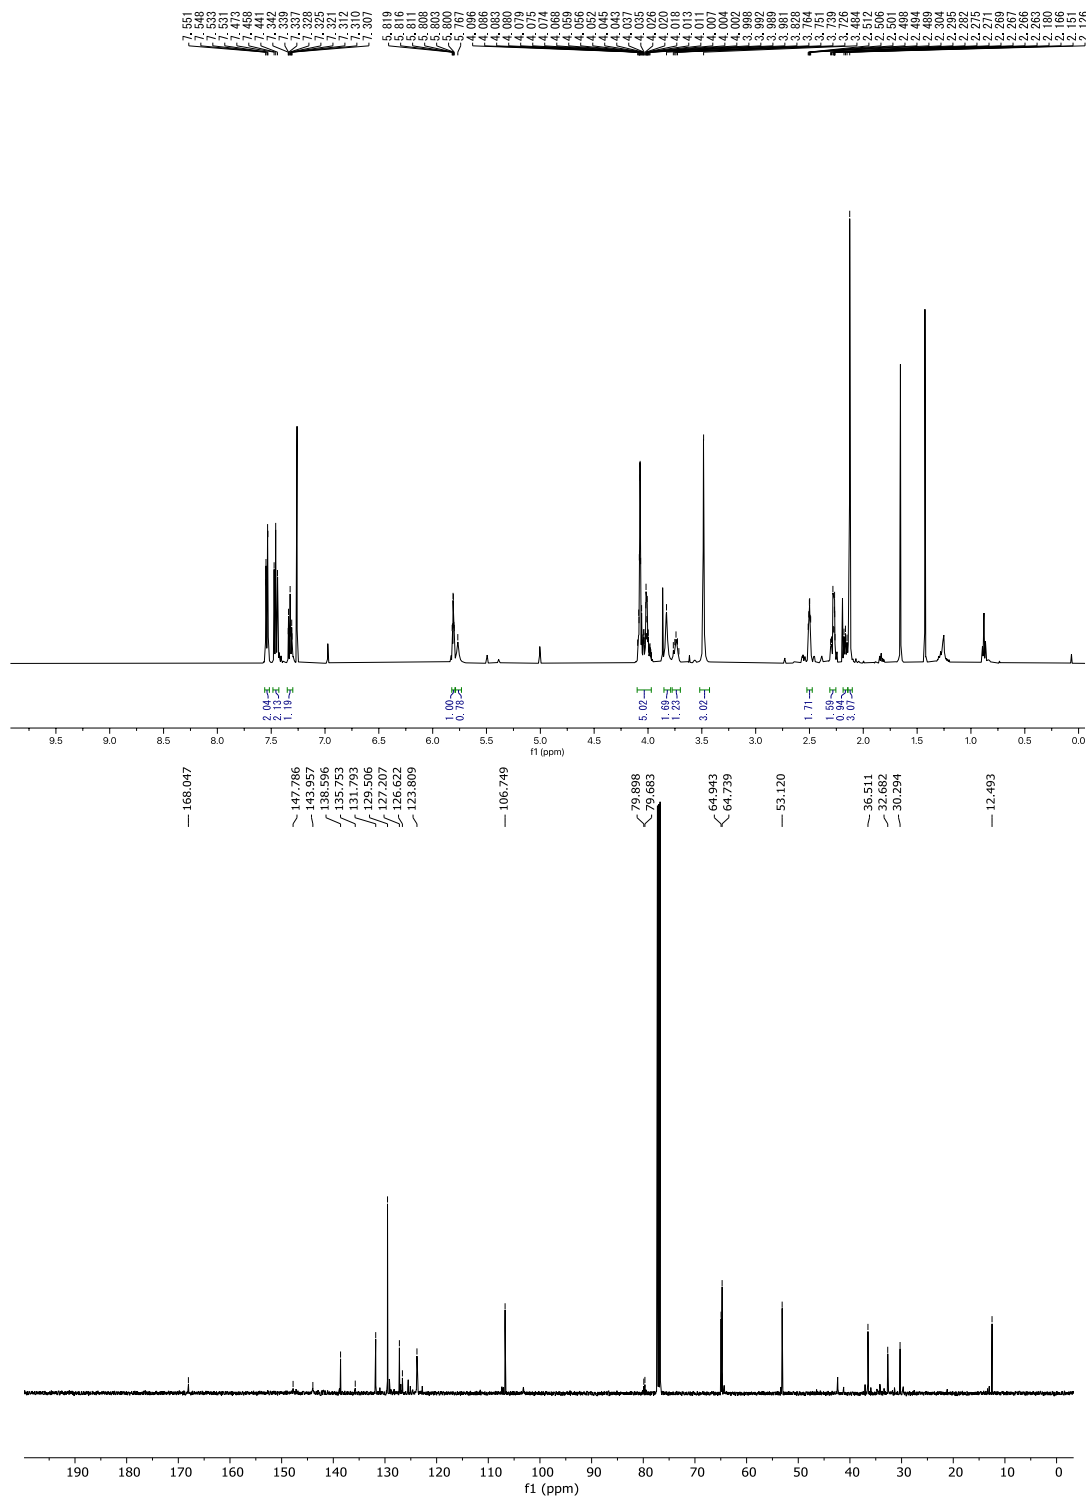

**Compound 5daa-diastereoisomer 1:**

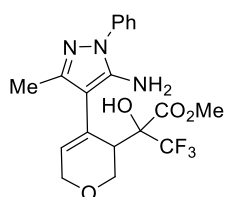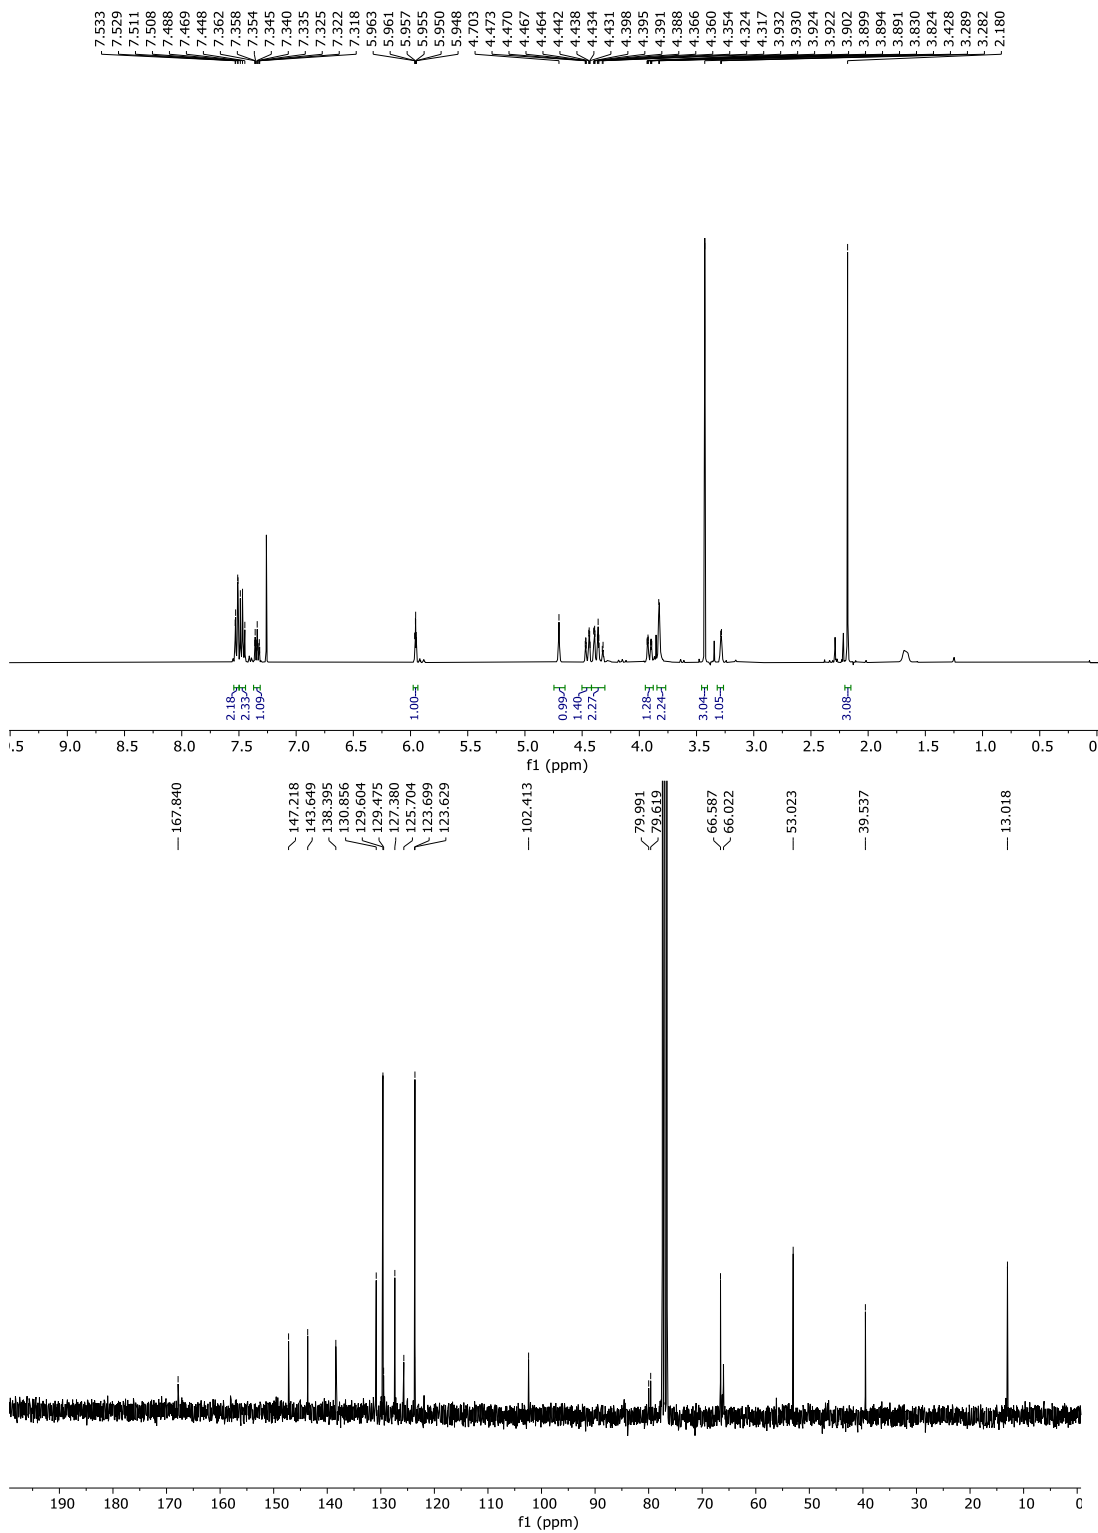

**Compound 5daa-diastereoisomer 2:**

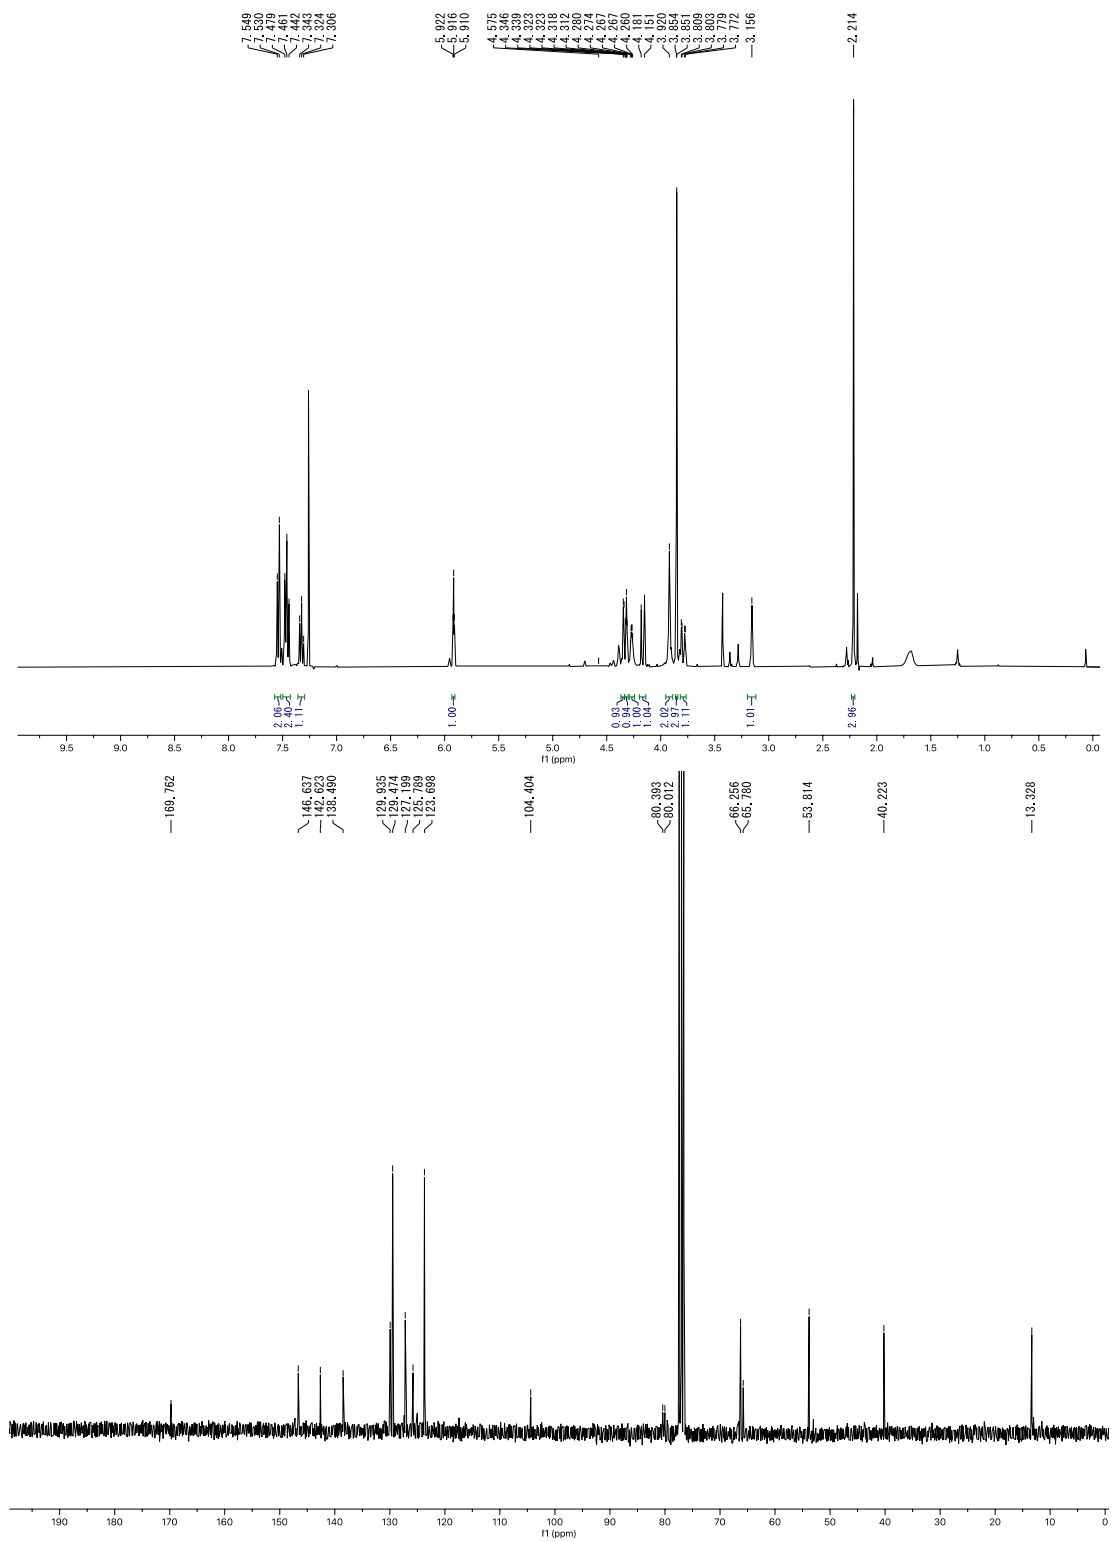

**Compound 5faa:**

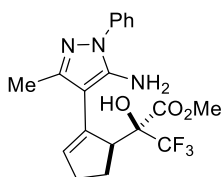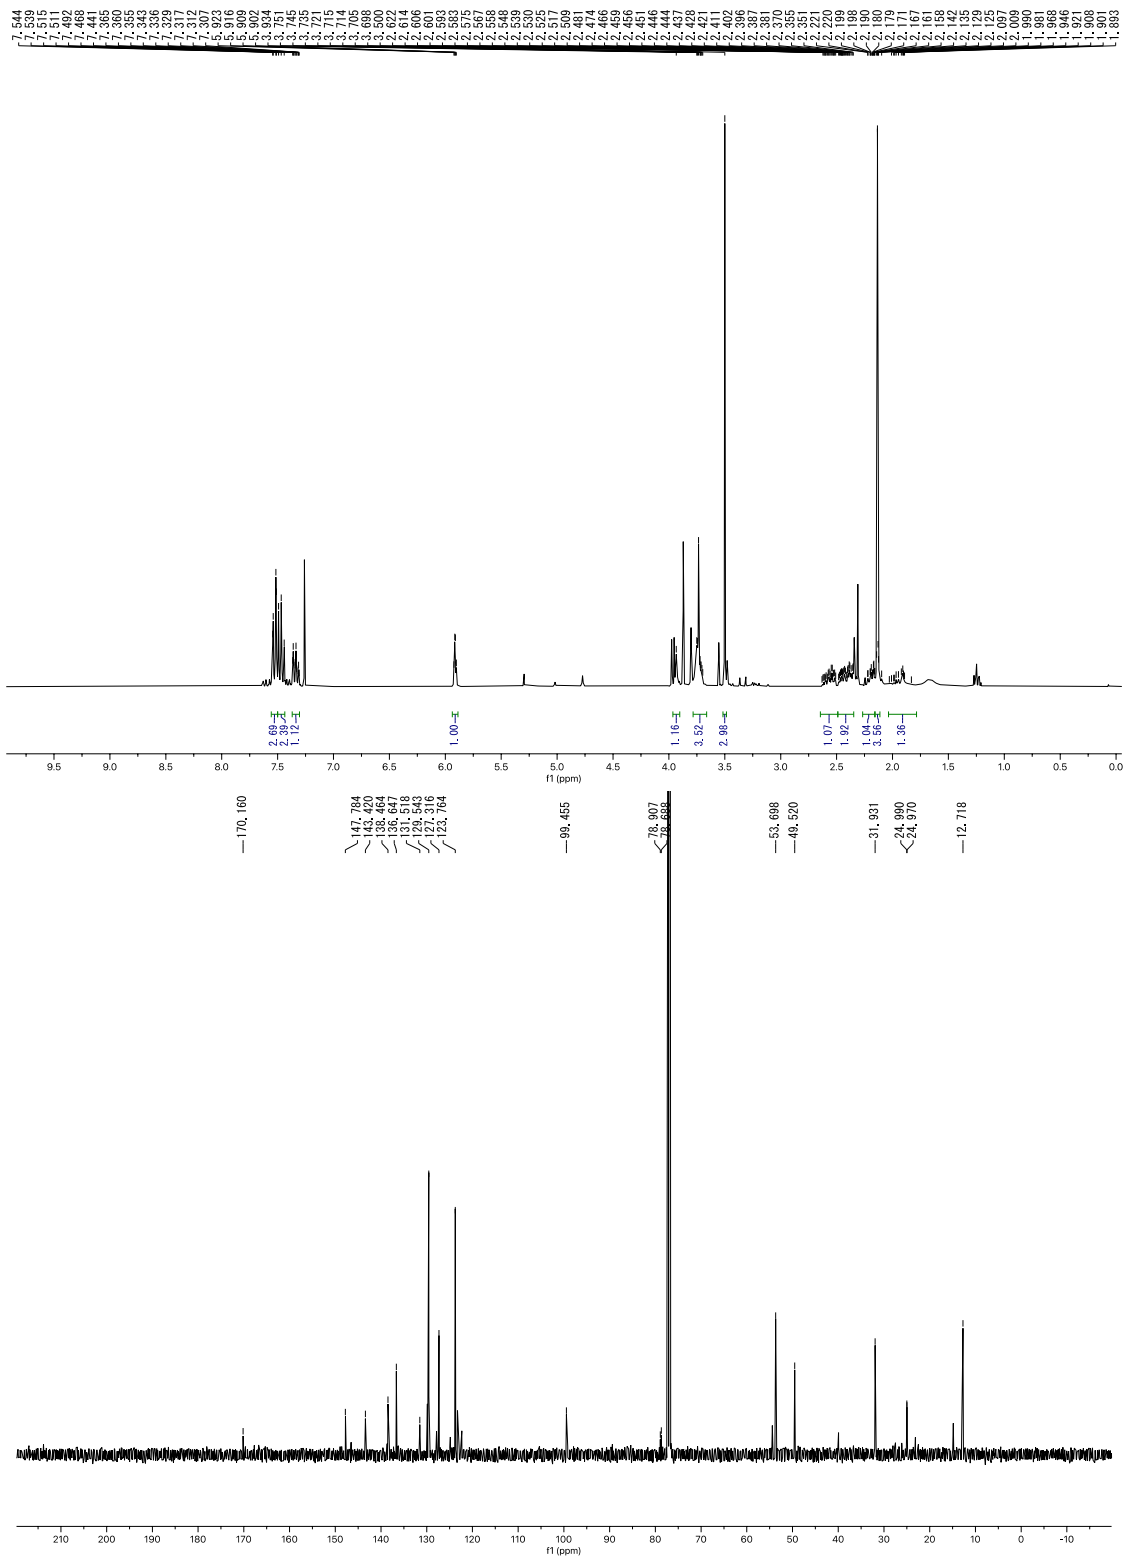



**Compound 5gaa:**

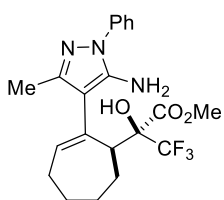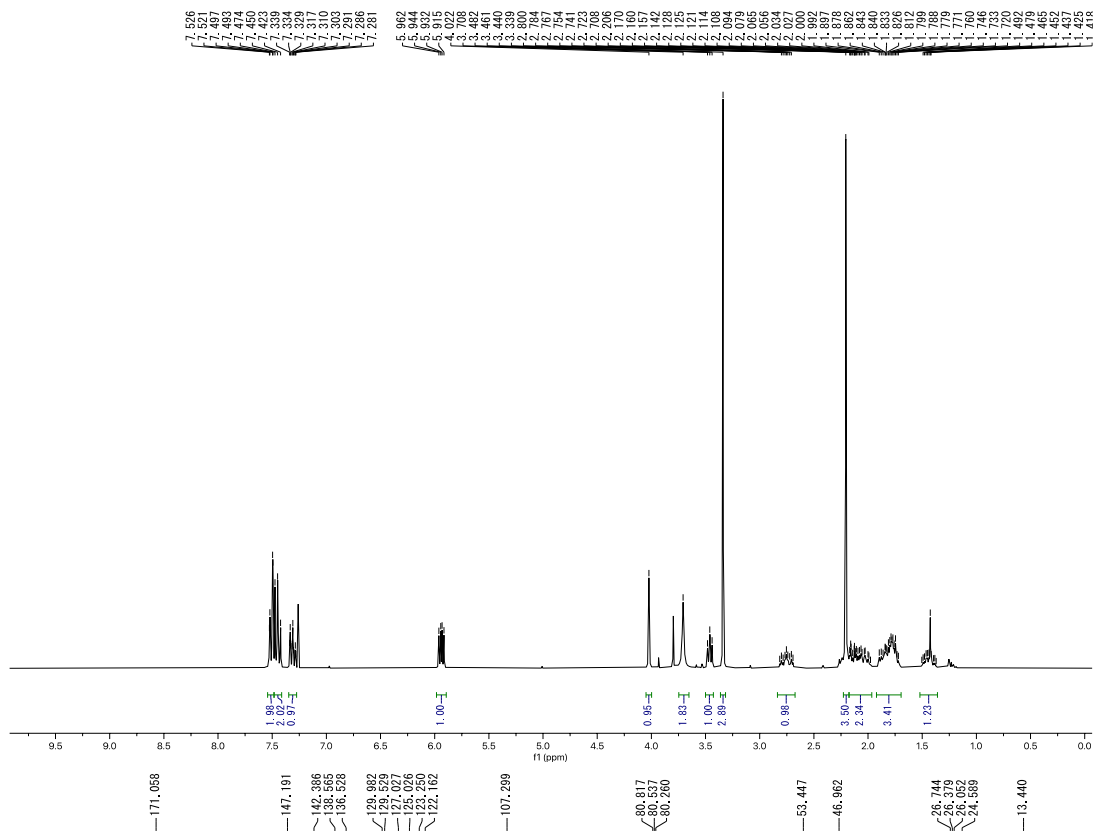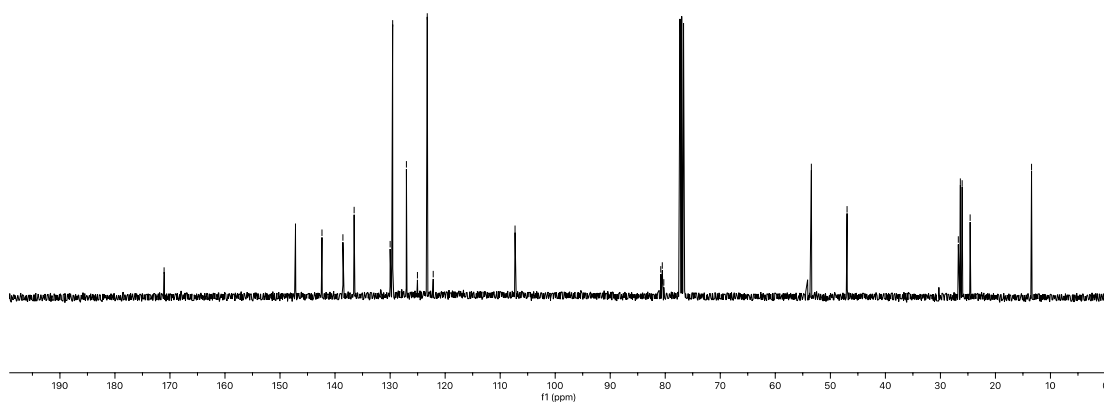

**Compound 5aba:**

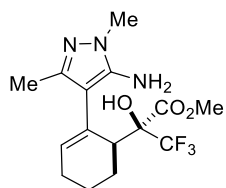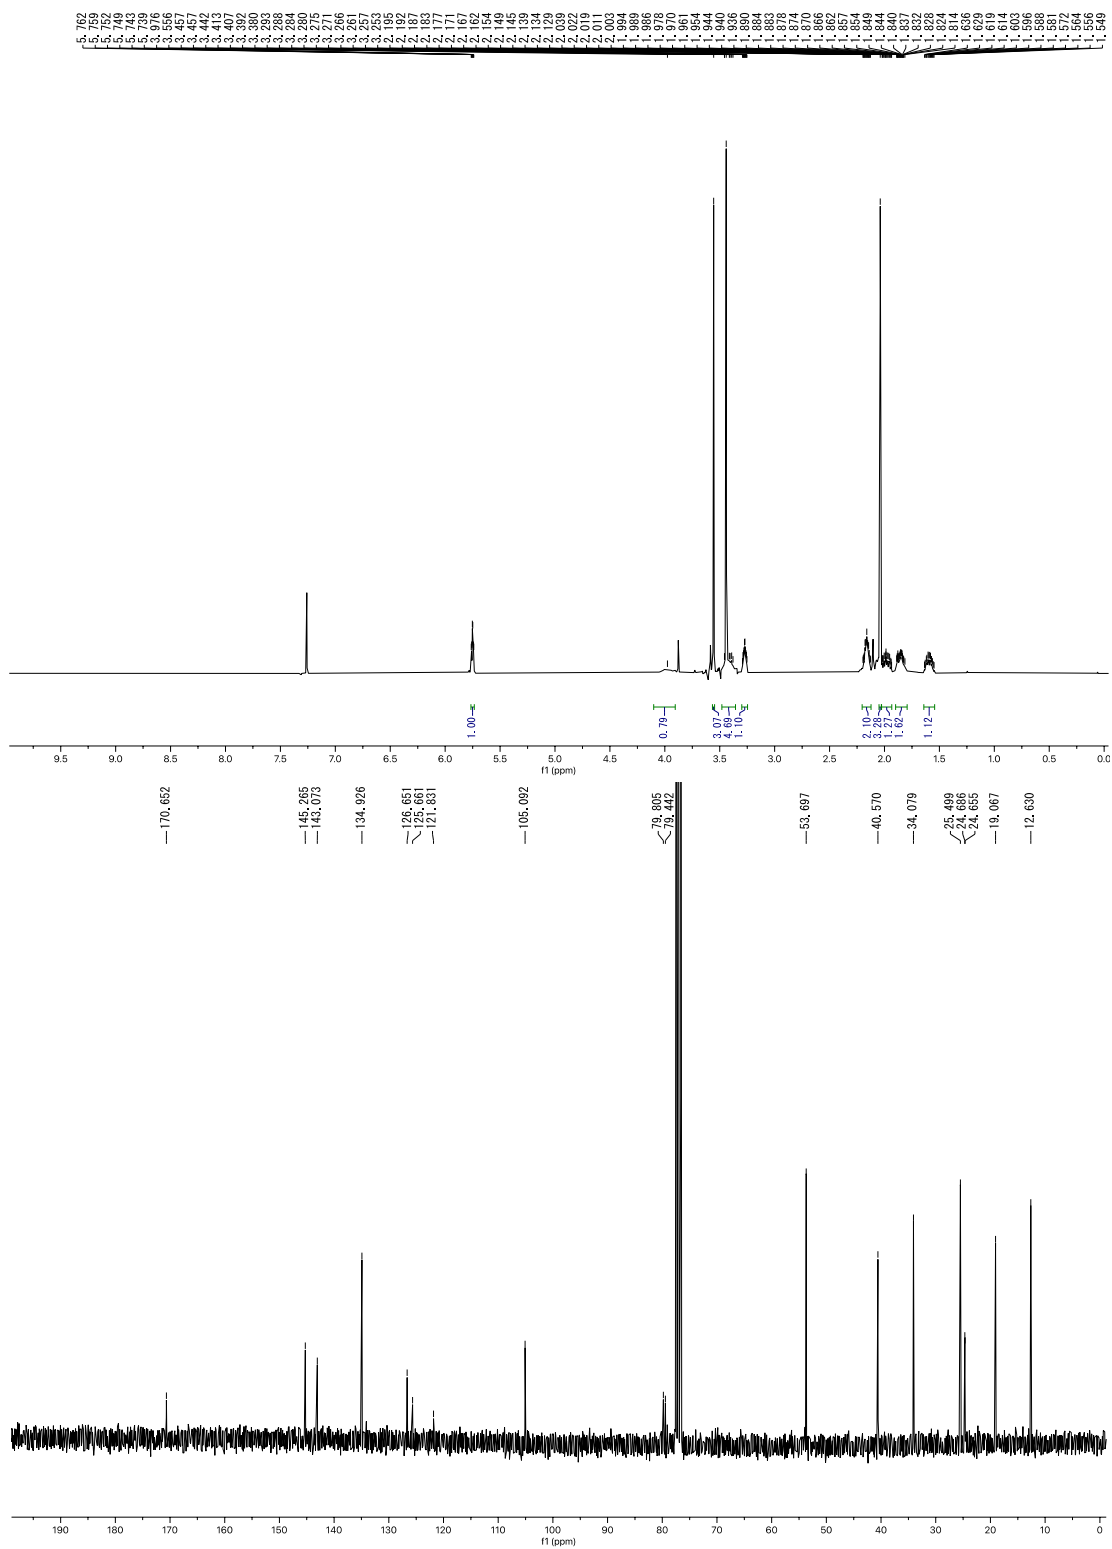

**Compound 5aca:**

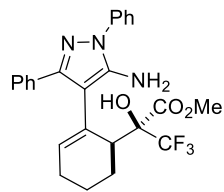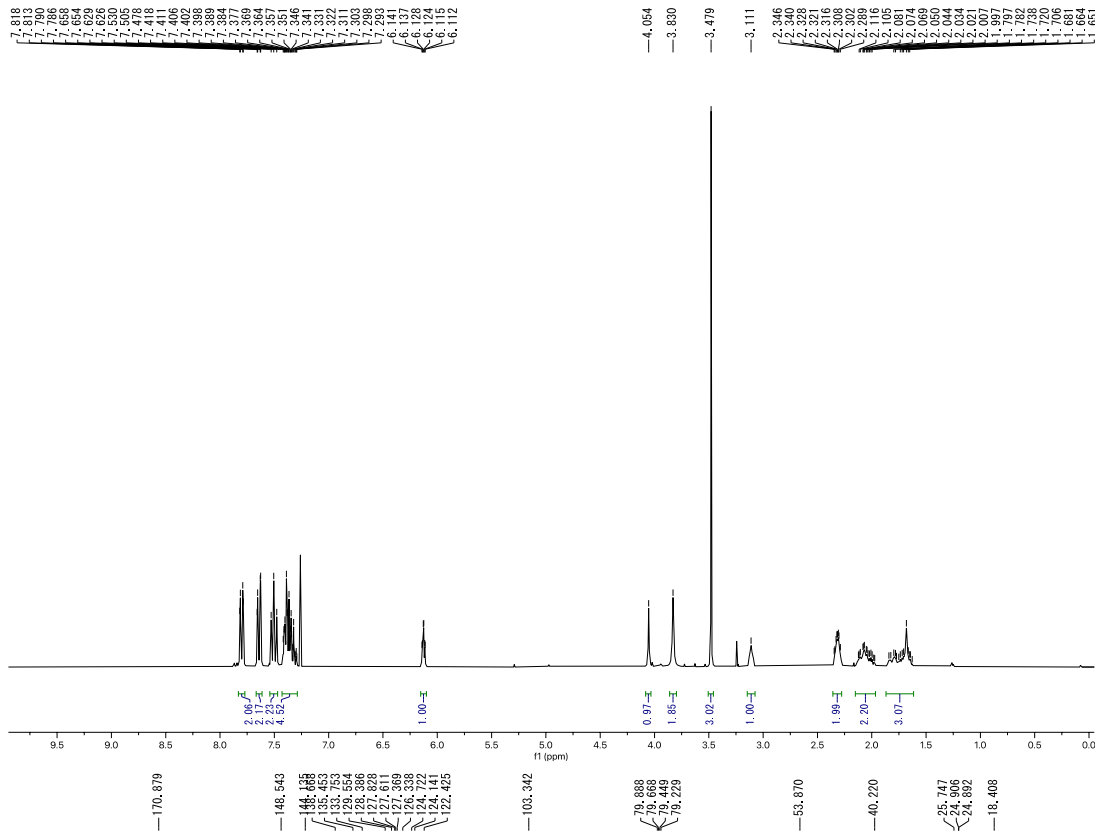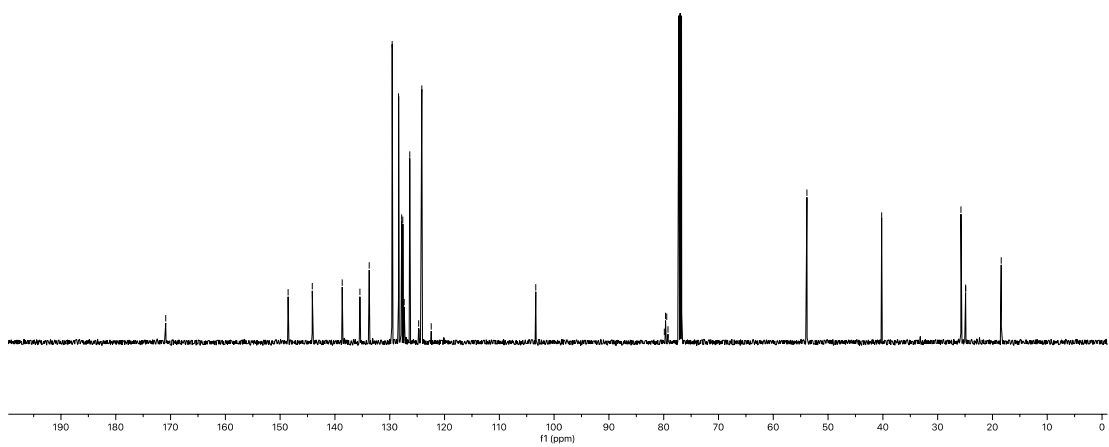

**Compound 5ada:**

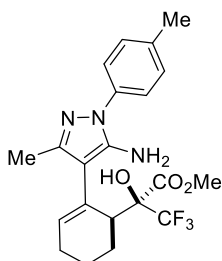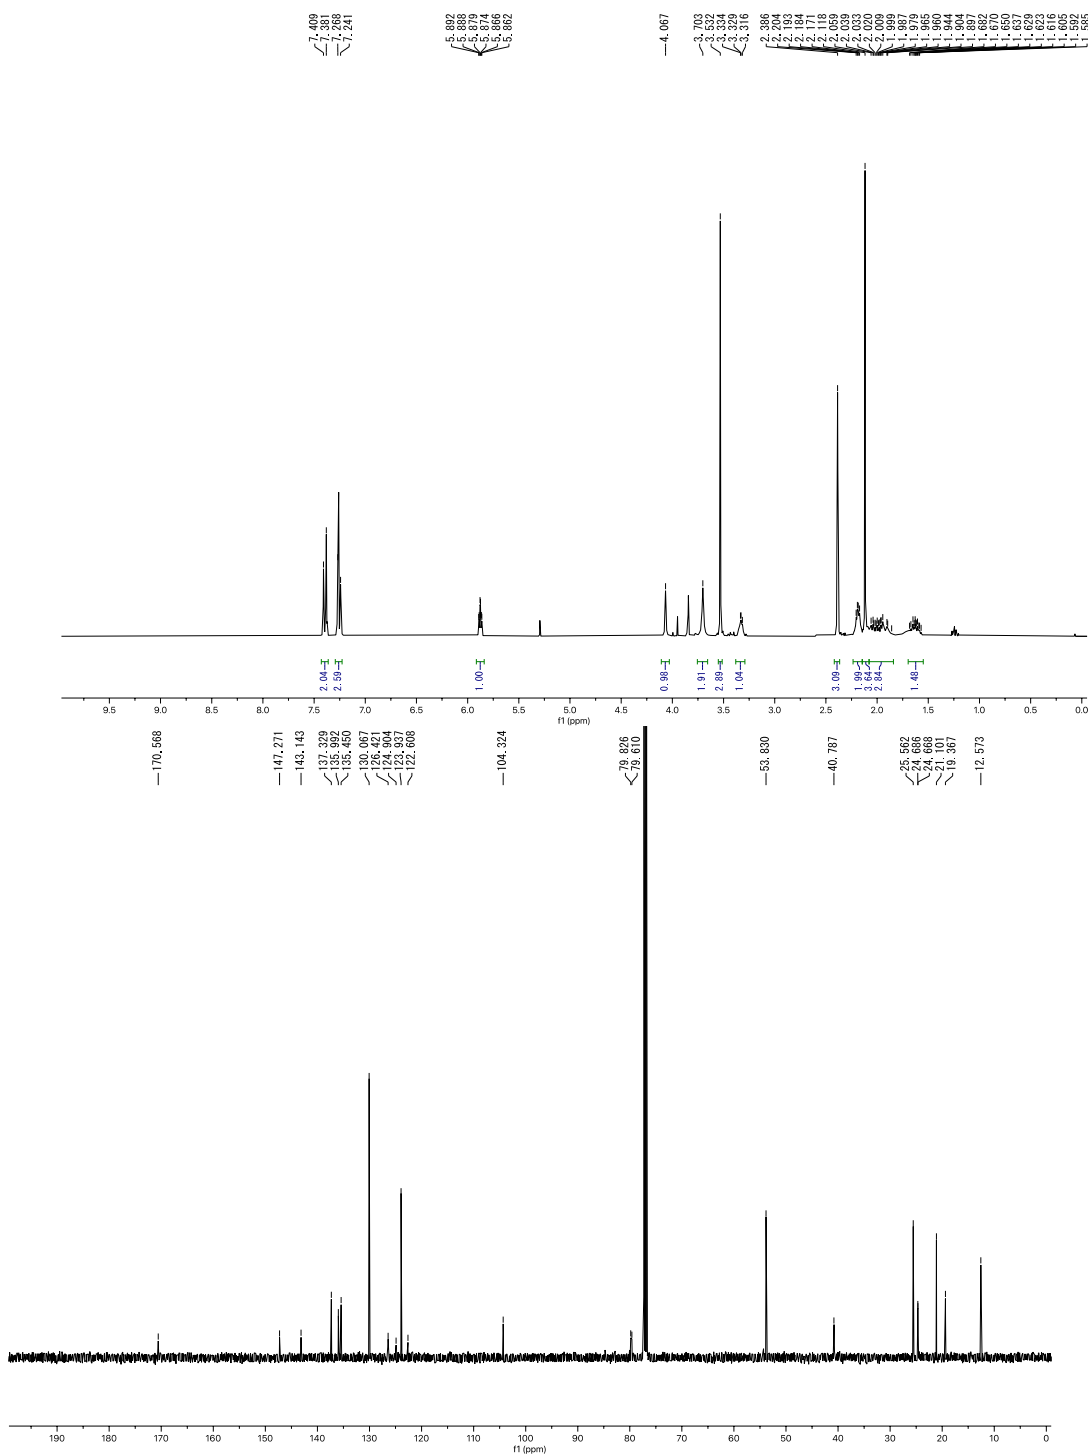

**Compound 7:**

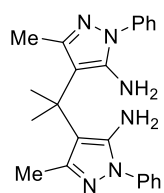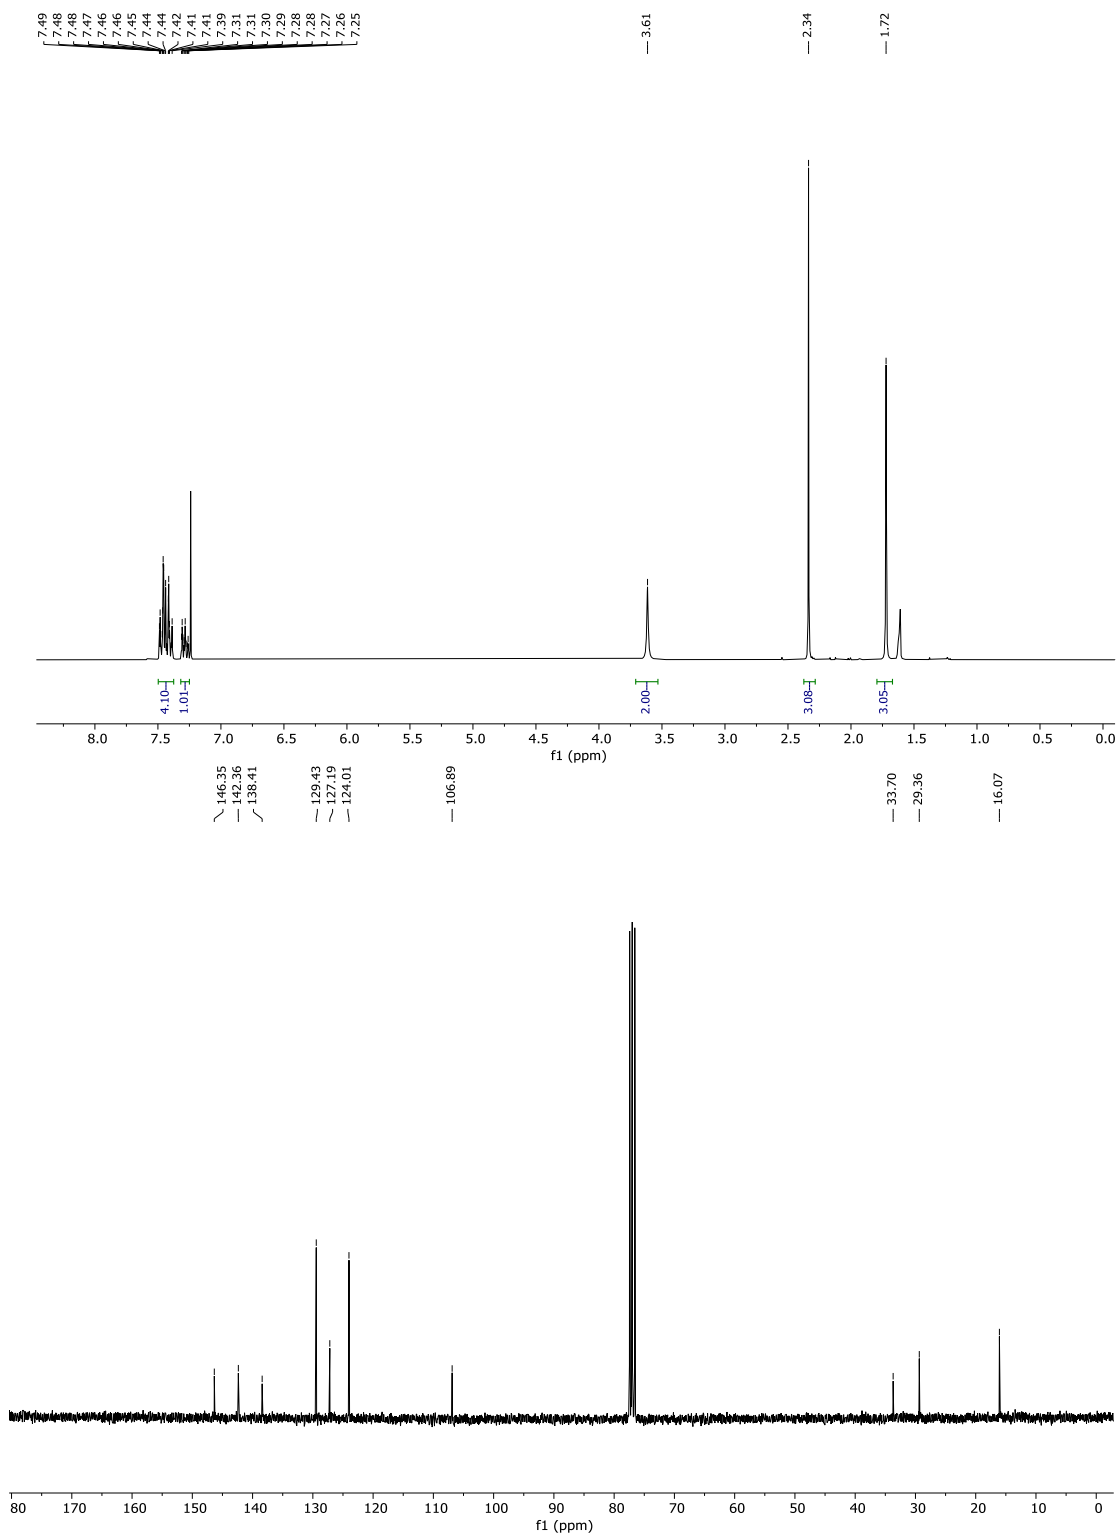

## 7. HPLC DATA

### • Compound 5aaa:

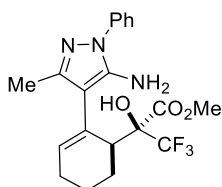

Data Path: C:\WIN32APP\HSM\CARLOS\DATA\LC-1032 AYH 8020 1mL\  
Processing Method: Carlos-2

Application: Carlos

Series: LC-1032 AYH 8020 1mL

Sample Name: LC-1032 AYH 8020 1mL

Vial Number: 1

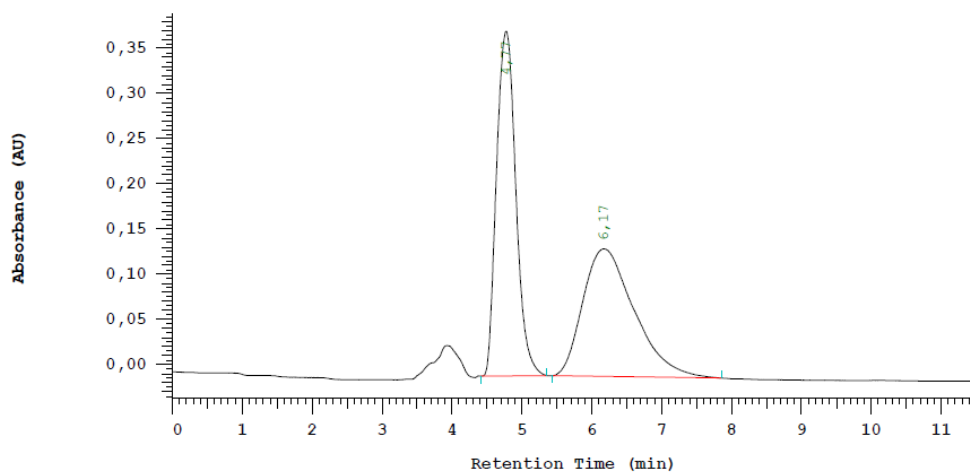

| No. | RT   | Area    | Area %  | Name |
|-----|------|---------|---------|------|
| 1   | 4,77 | 3655370 | 50,375  |      |
| 2   | 6,17 | 3600990 | 49,625  |      |
|     |      | 7256360 | 100,000 |      |

## **8. References**

1. Li, C.; Zhang, F.; Shen, Z. *Tetrahedron*, **2020**, 76, 131727.
2. Winters, G.; Sala, A.; De Paoli, A.; Conti, M. *Synthesis* **1984**, 1050-1052.
